# Supplementary material for: I2/DMSO-catalyzed one-pot approach for the synthesis of 1,3,4-selenadiazoles
Source: Royal Society of Chemistry journal article supplement (doi:10.1039/d0ra10576g), 2021-01-01
Supplement: d0ra10576g1.pdf [file d0ra10576g1.pdf]

## **I<sub>2</sub>/DMSO-catalyzed one-pot approach for the synthesis of 1,3,4-Selenadiazoles**

Suresh Kuarm Bowroju <sup>[a]</sup>, and Rajitha Bavanthula <sup>[a]\*</sup>

Solvents were dried over standard drying agents and were freshly distilled prior to use. Chemicals were purchased from Aldrich and Fluka firms and used without further purification. All column chromatographic separations were performed using silica gel (Acme's, 60–120 mesh). Organic solutions were dried over anhydrous Na<sub>2</sub>SO<sub>4</sub> and concentrated below 40°C in vacuo. Melting points are uncorrected and were determined in open capillaries. The reactions were monitored by thin layer chromatography (TLC) and visualized with UV light. The <sup>1</sup>H NMR spectra were recorded on Bruker Avance 400 MHz spectrometer using TMS as an internal standard. Spectral analyses were carried out in CDCl<sub>3</sub> or DMSO-*d*<sub>6</sub> for both <sup>1</sup>H and <sup>13</sup>C spectra. Chemical shifts were measured in δ parts per million (*ppm*) and coupling constants (*J*) were measured in hertz (Hz). HRMS spectra were recorded on XEVO G2-XS QTOF Spectrometer. The elemental analysis of the compounds was done on a Carlo Erba Model EA1108.

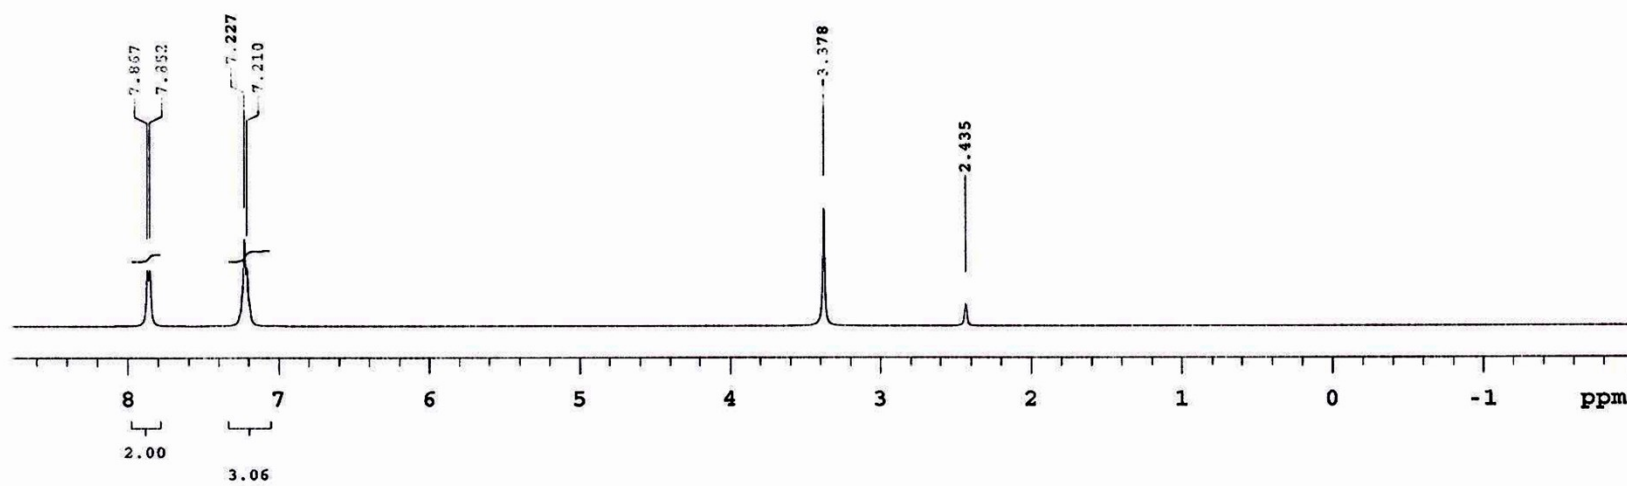

$^1\text{H}$  NMR spectrum of compound 3a in  $\text{DMSO-d}_6$

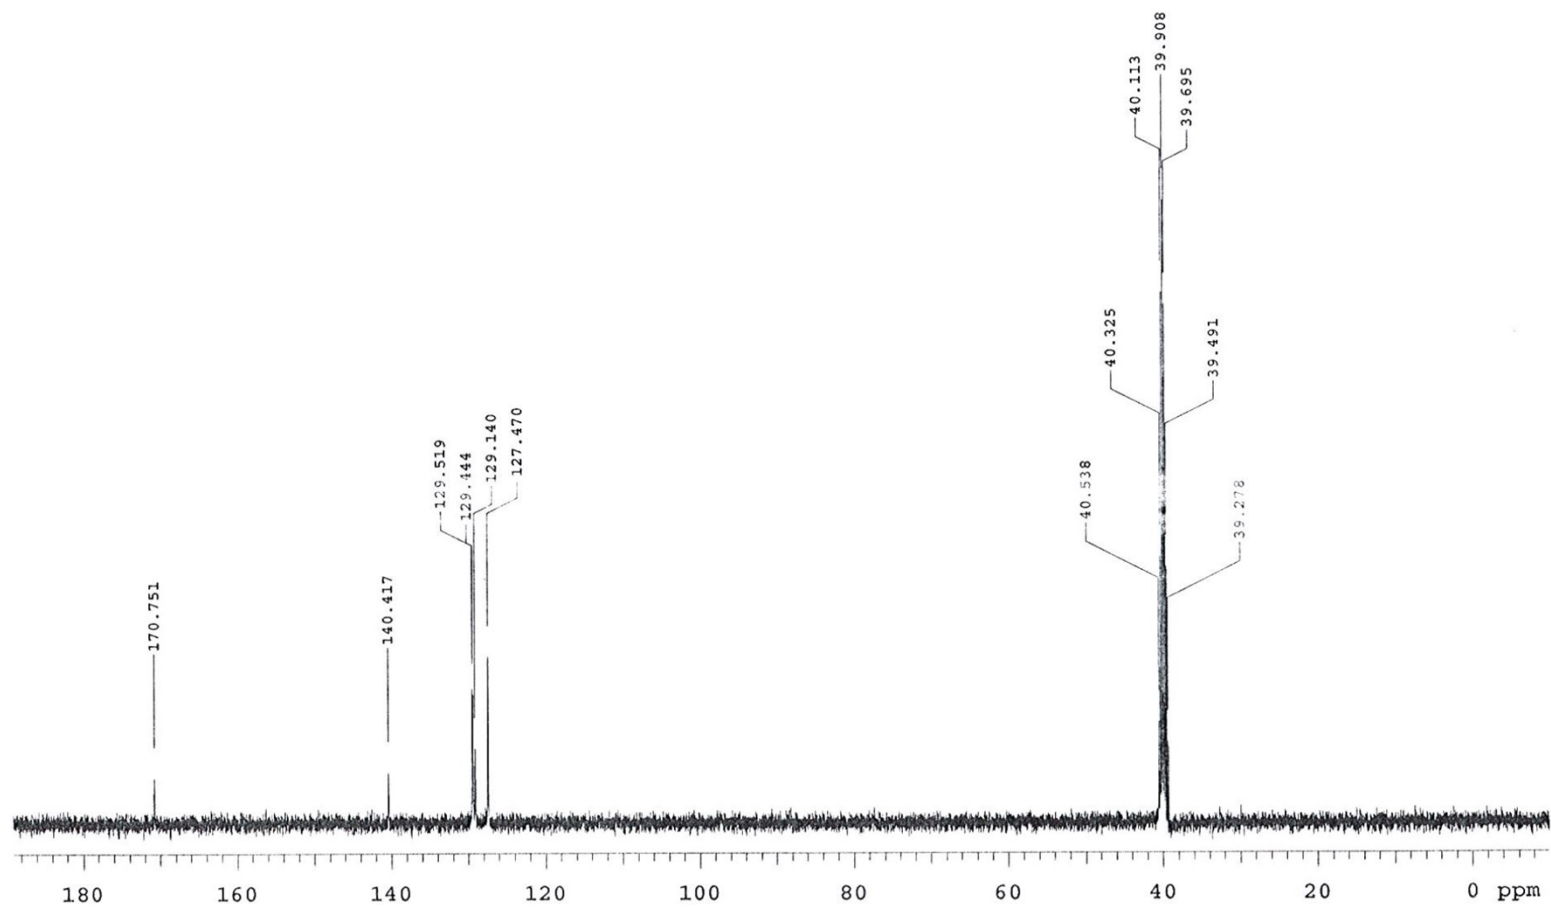

$^{13}\text{C}$  NMR spectrum of compound 3a in  $\text{DMSO-d}_6$

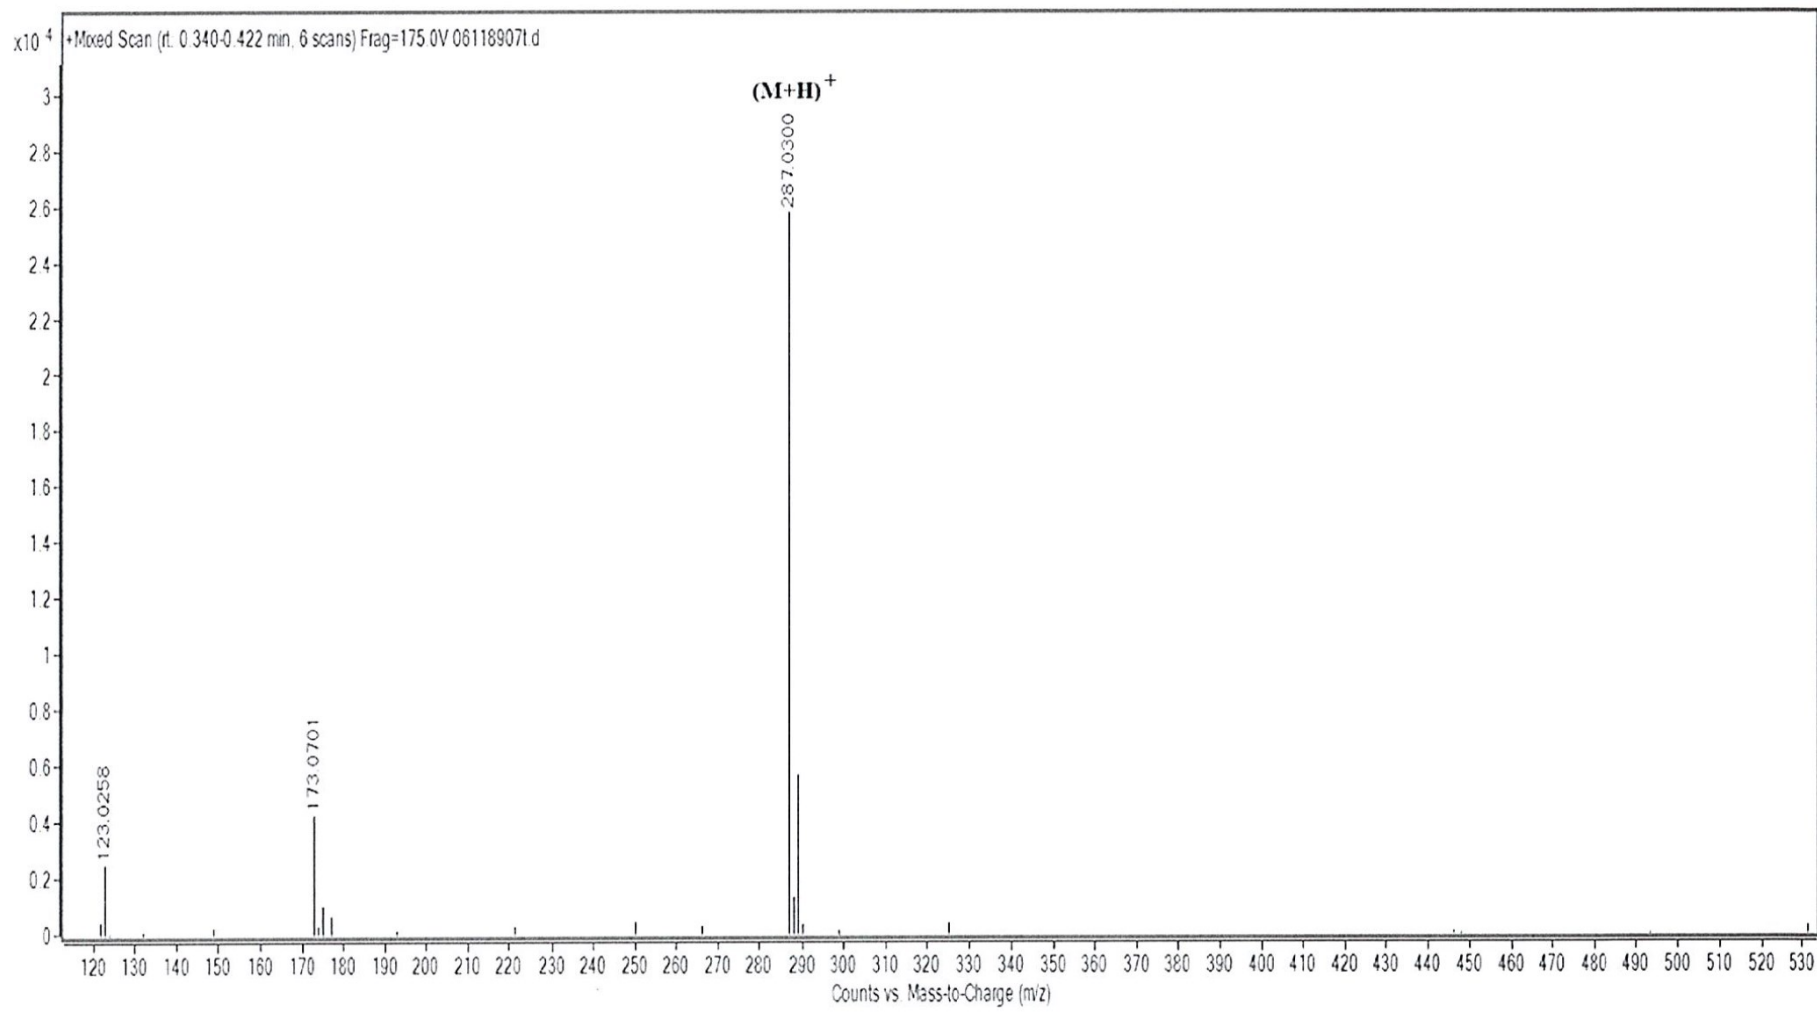

HRMS spectrum of compound 3a

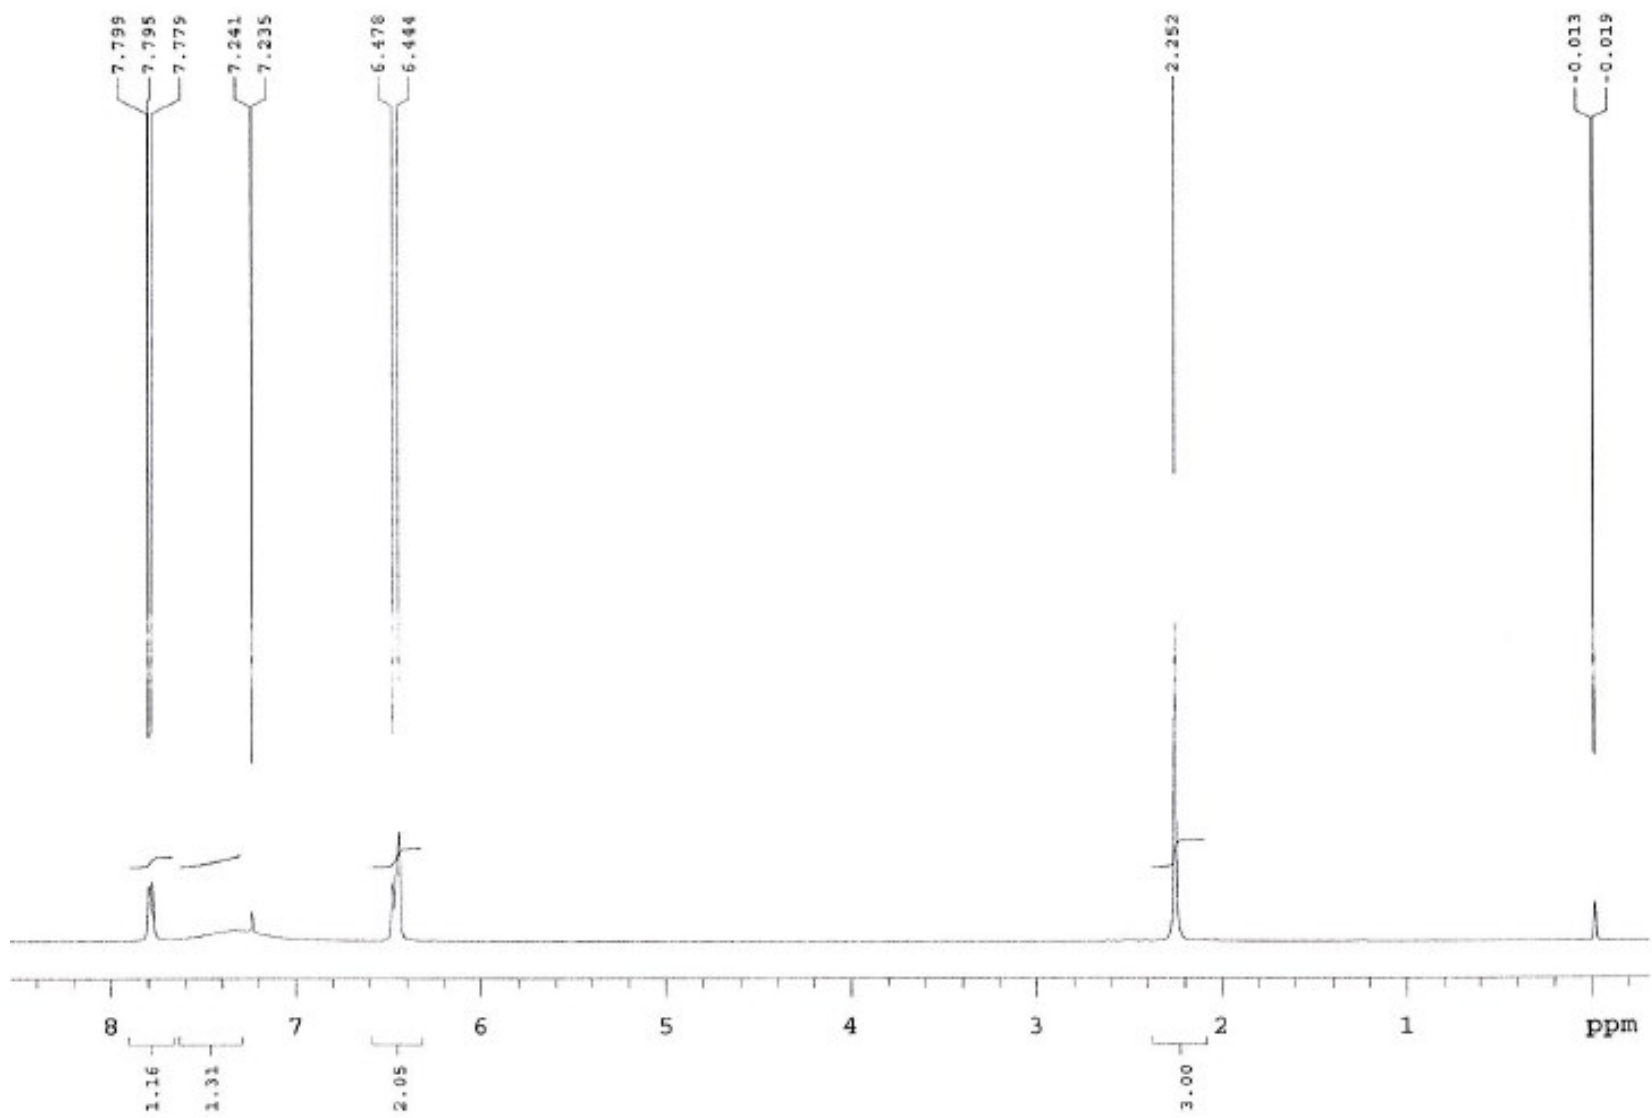

$^1\text{H}$  NMR spectrum of compound 3b in  $\text{CDCl}_3$

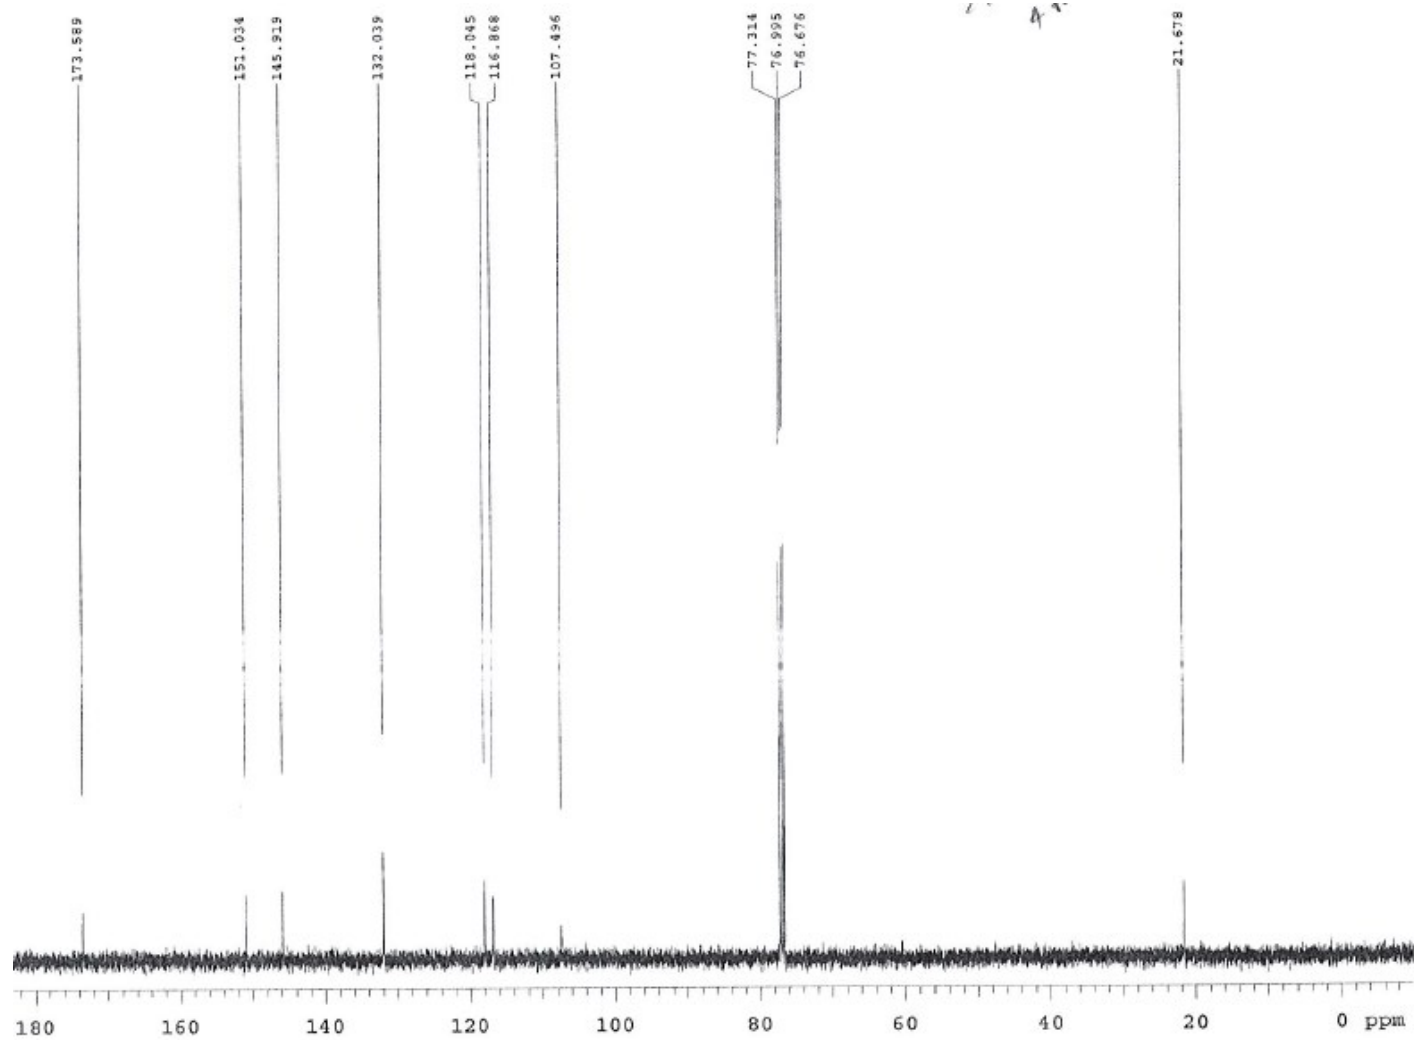

**<sup>13</sup>C NMR spectrum of compound 3b in CDCl<sub>3</sub>**

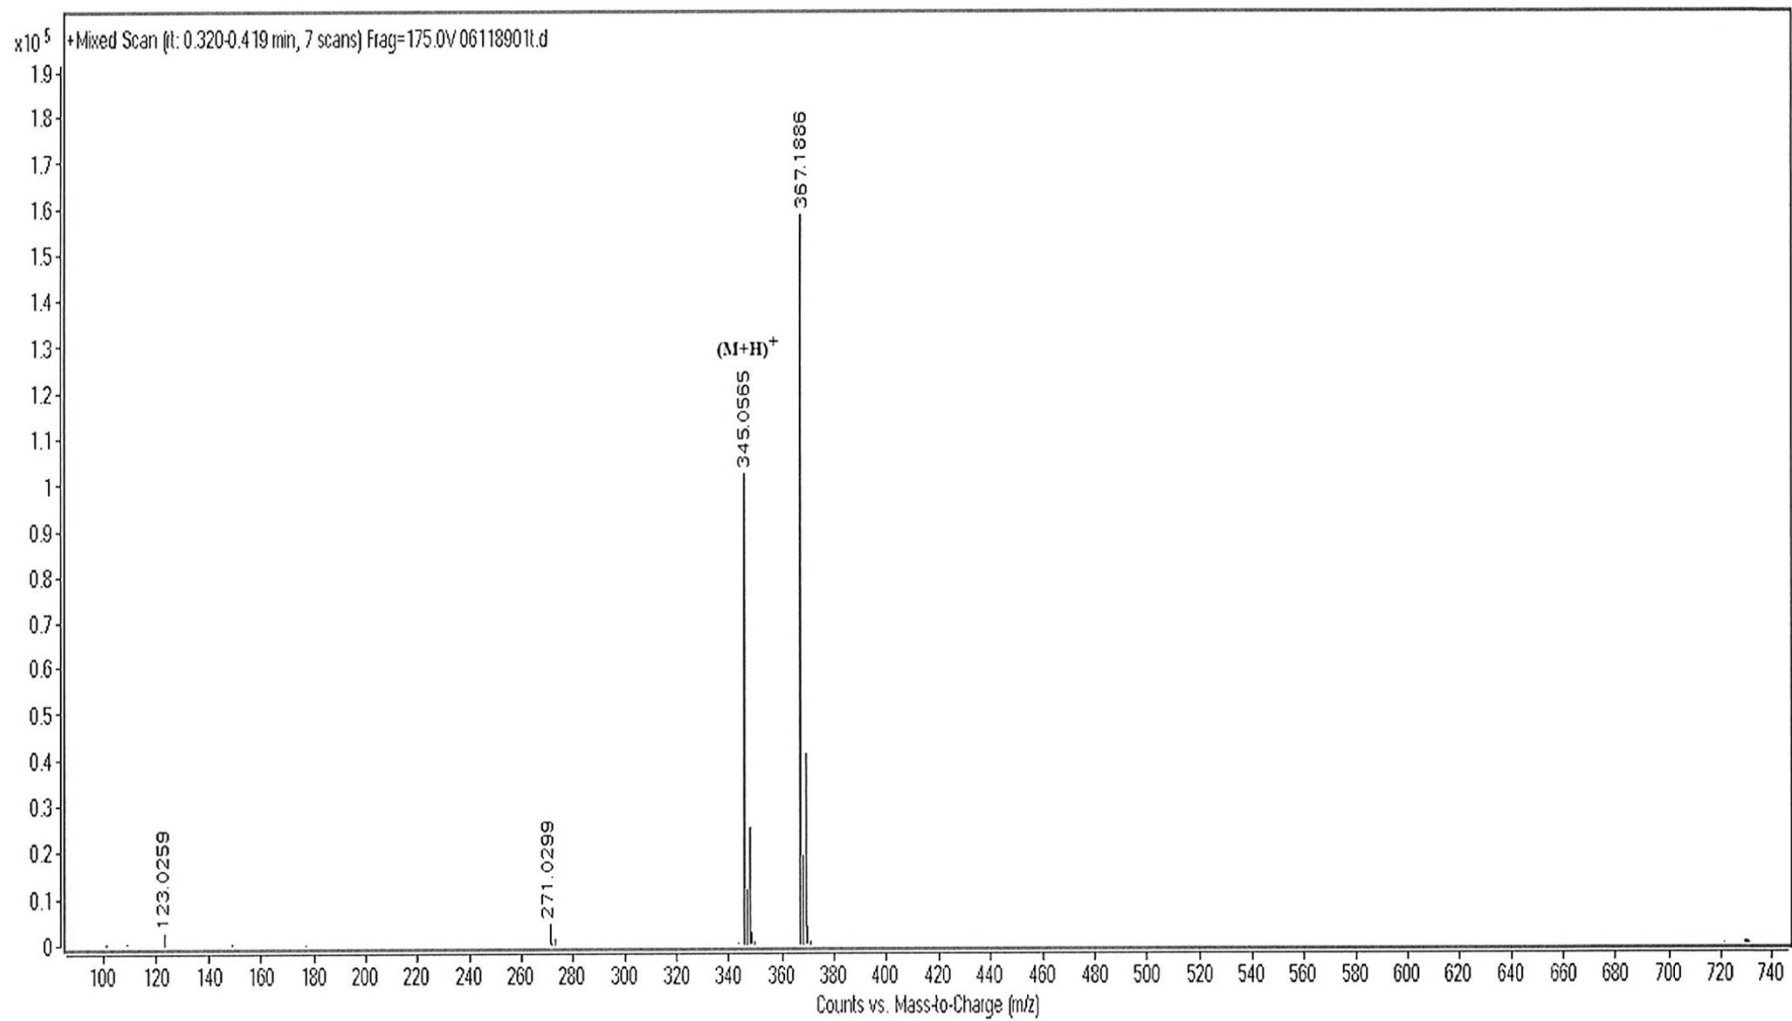

HRMS spectrum of compound 3b

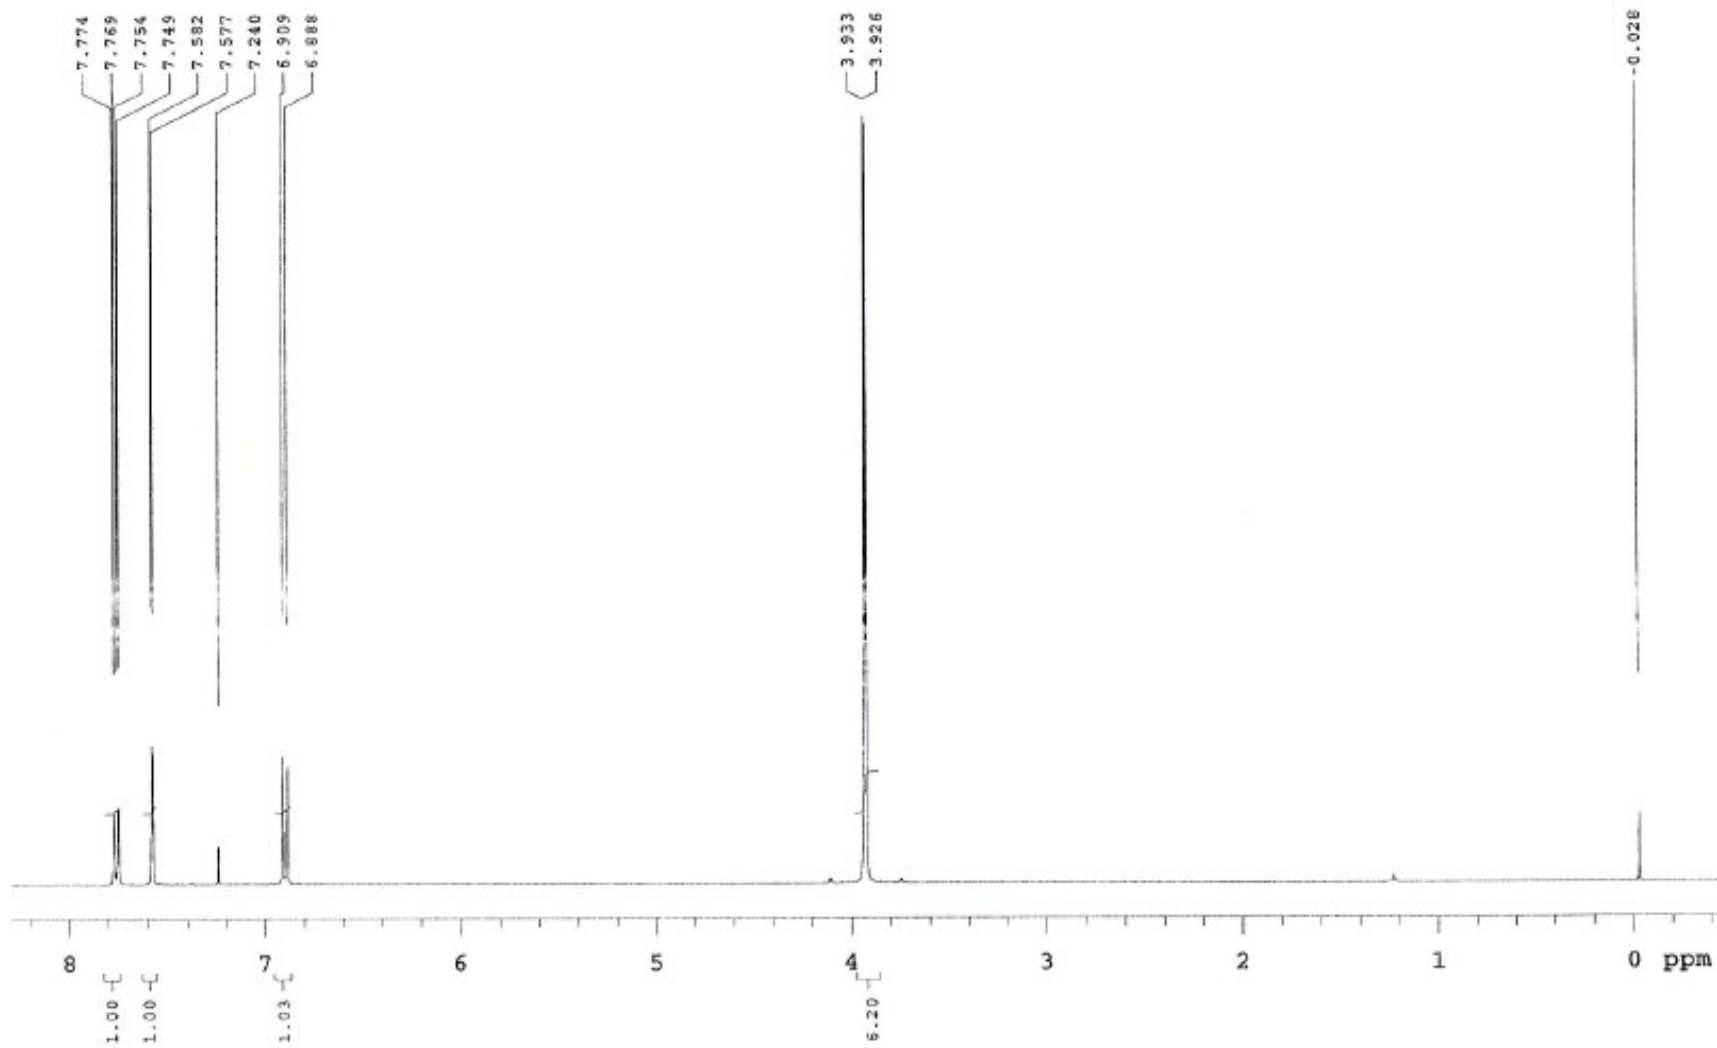

$^1\text{H}$  NMR spectrum of compound 3c in  $\text{CDCl}_3$



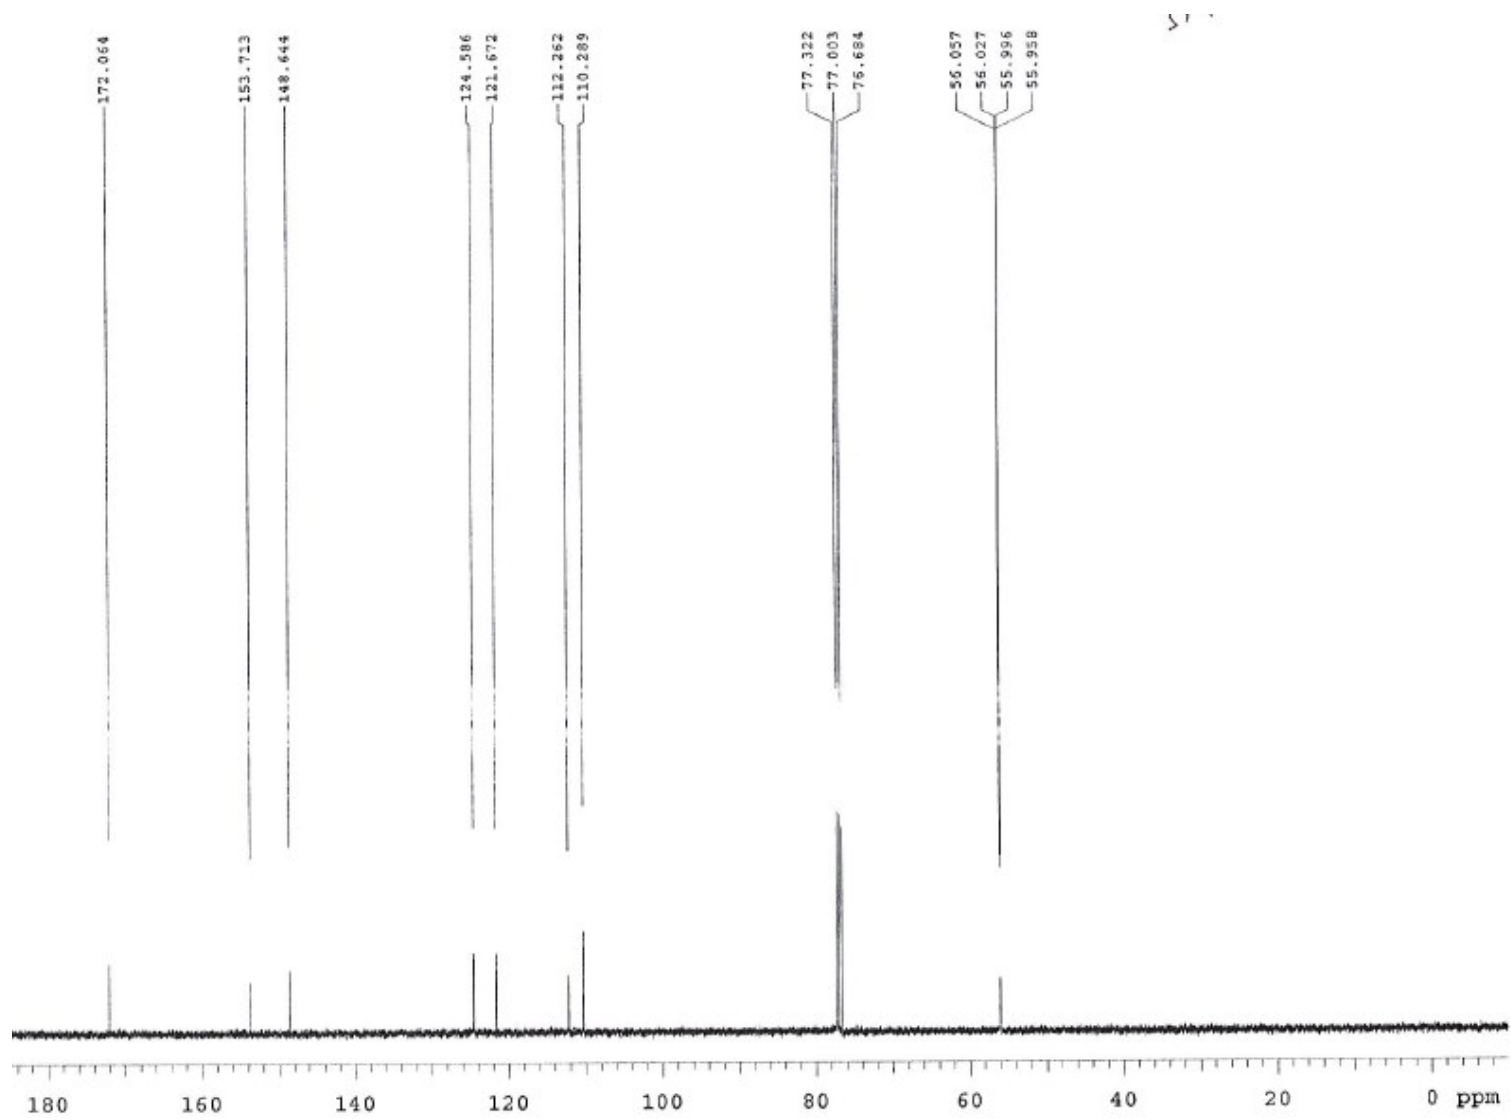

$^{13}\text{C}$  NMR spectrum of compound 3c in  $\text{CDCl}_3$

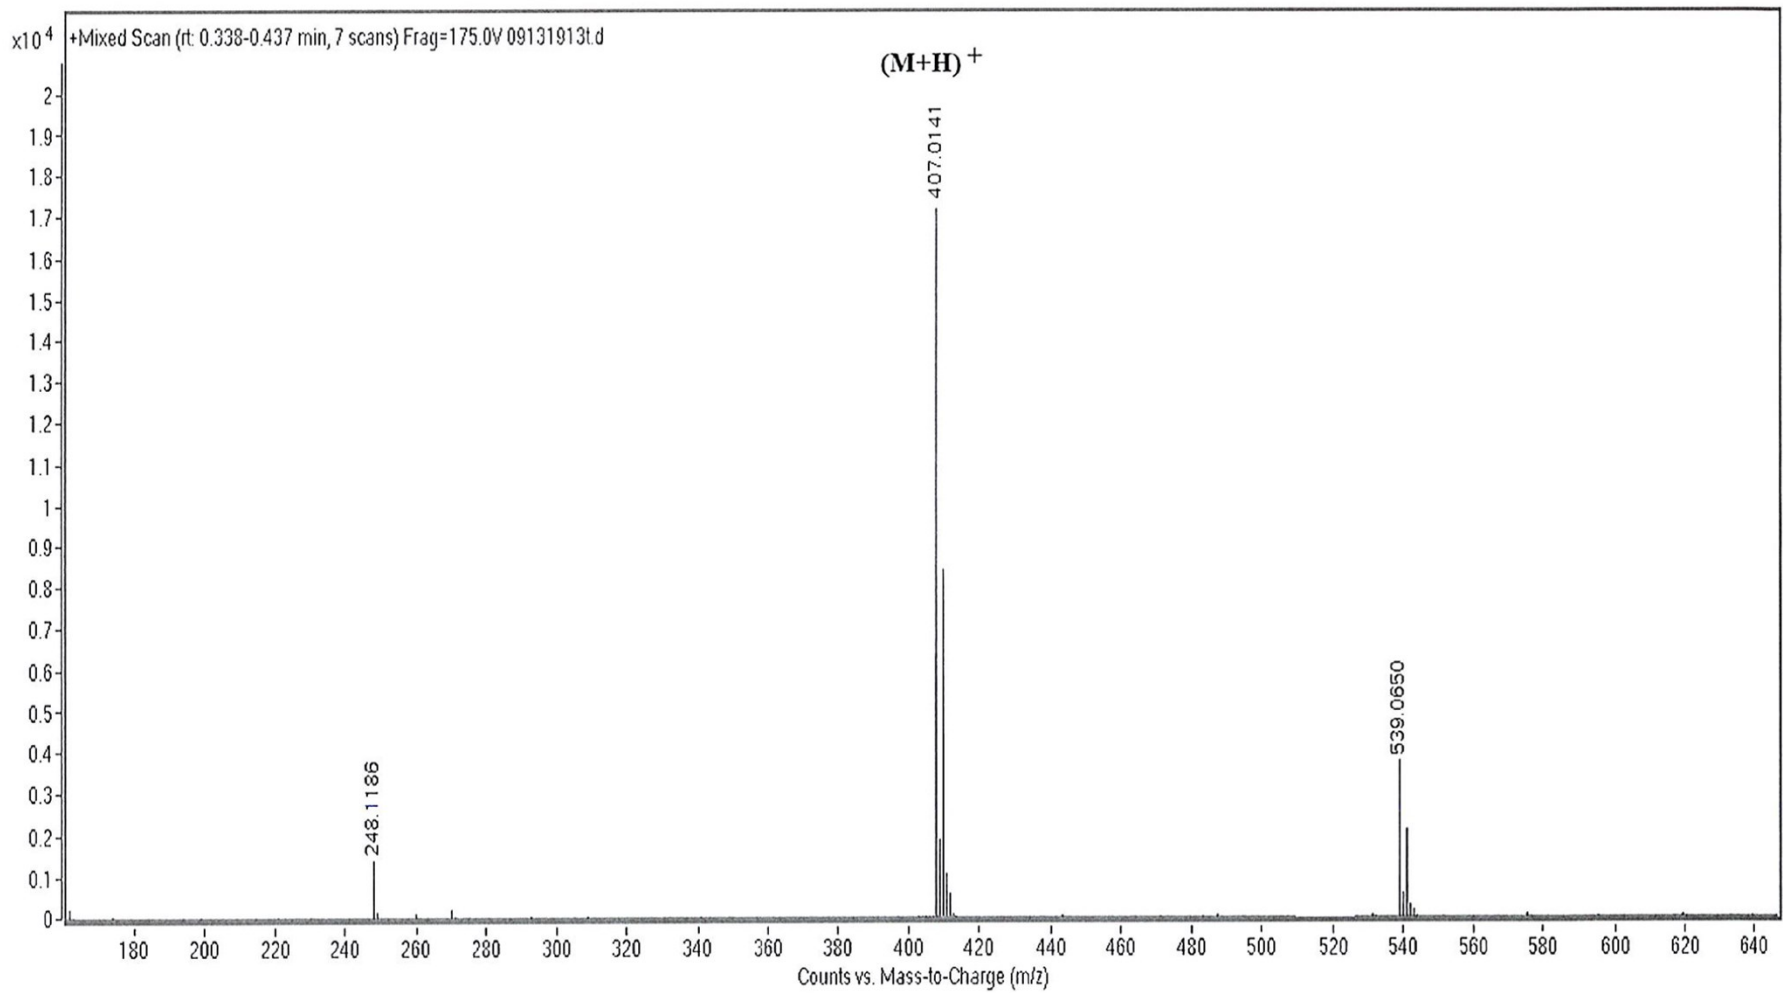

**HRMS spectrum of compound 3c**

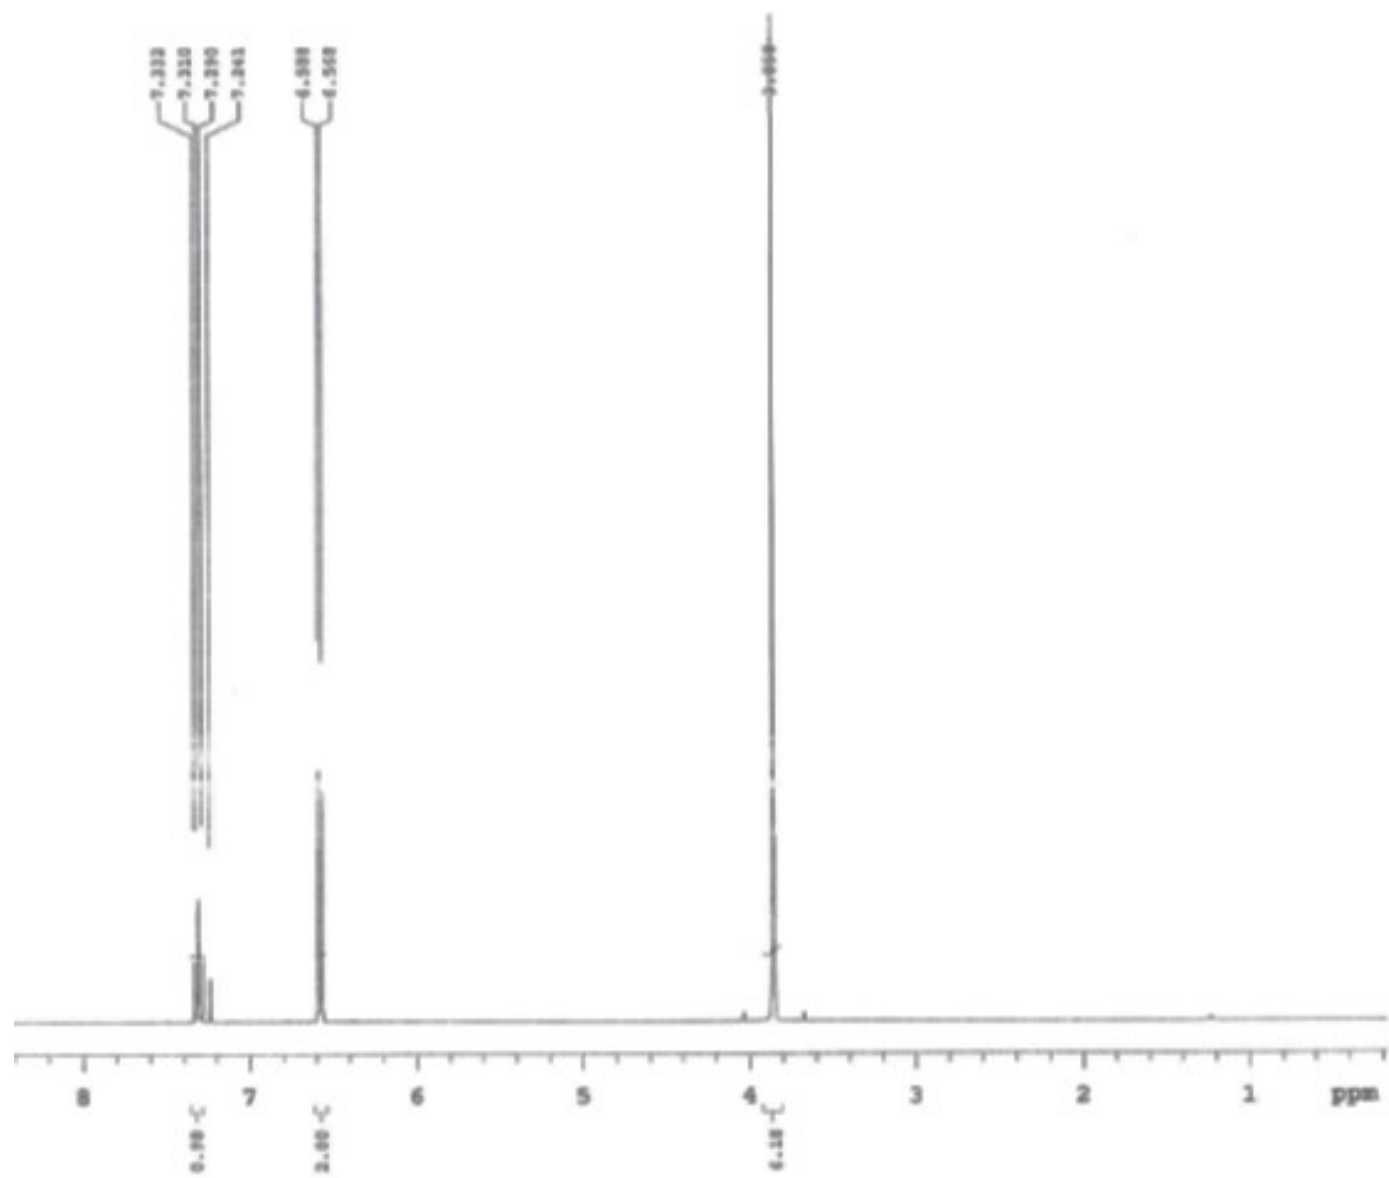

$^1\text{H}$  NMR spectrum of compound 3d in  $\text{DMSO-d}_6$

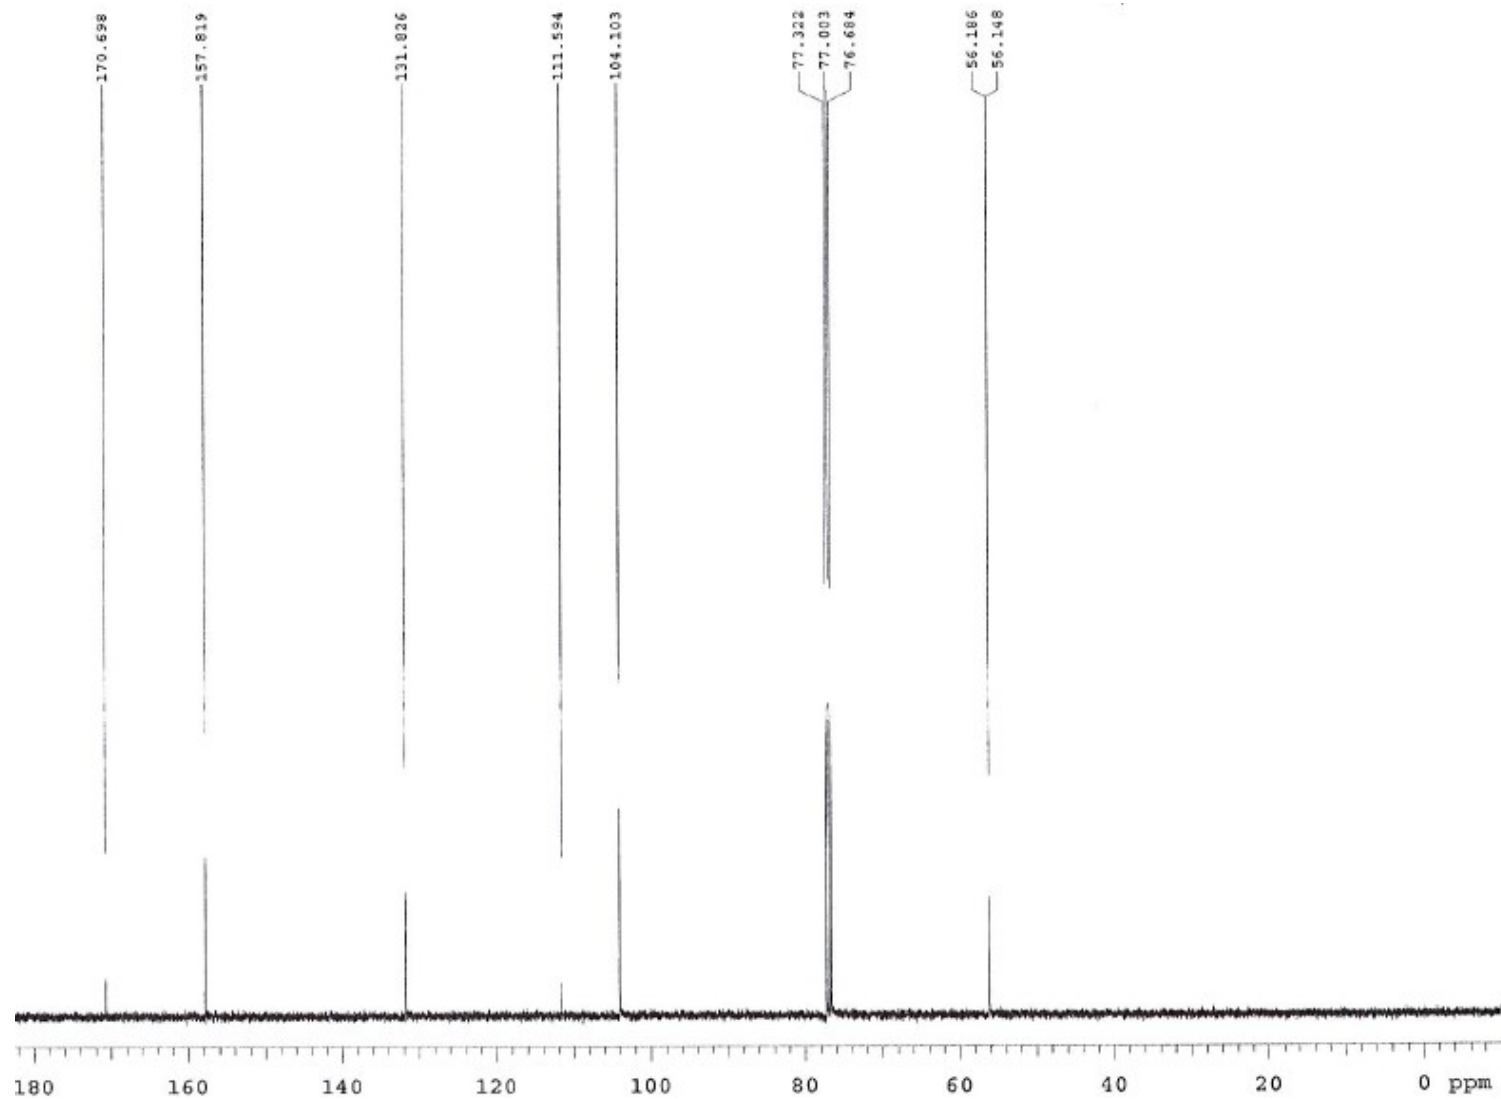

$^{13}\text{C}$  NMR spectrum of compound 3d in  $\text{DMSO-d}_6$

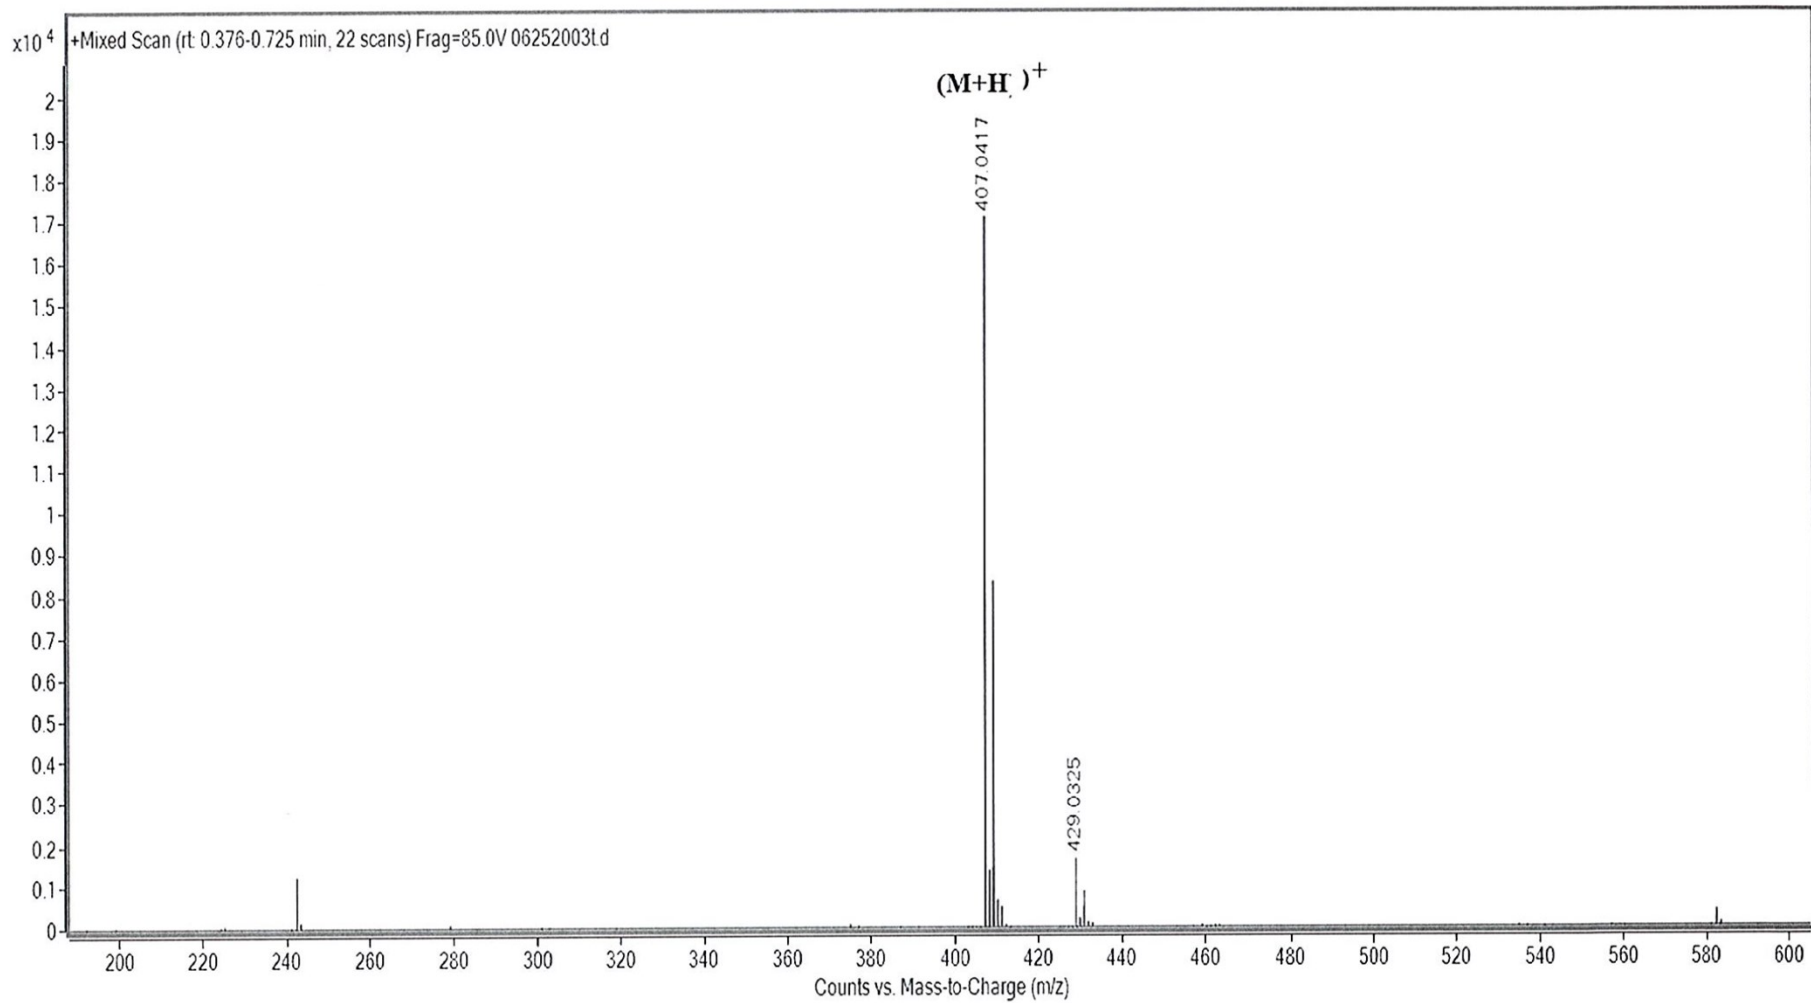

**HRMS spectrum of compound 3d**

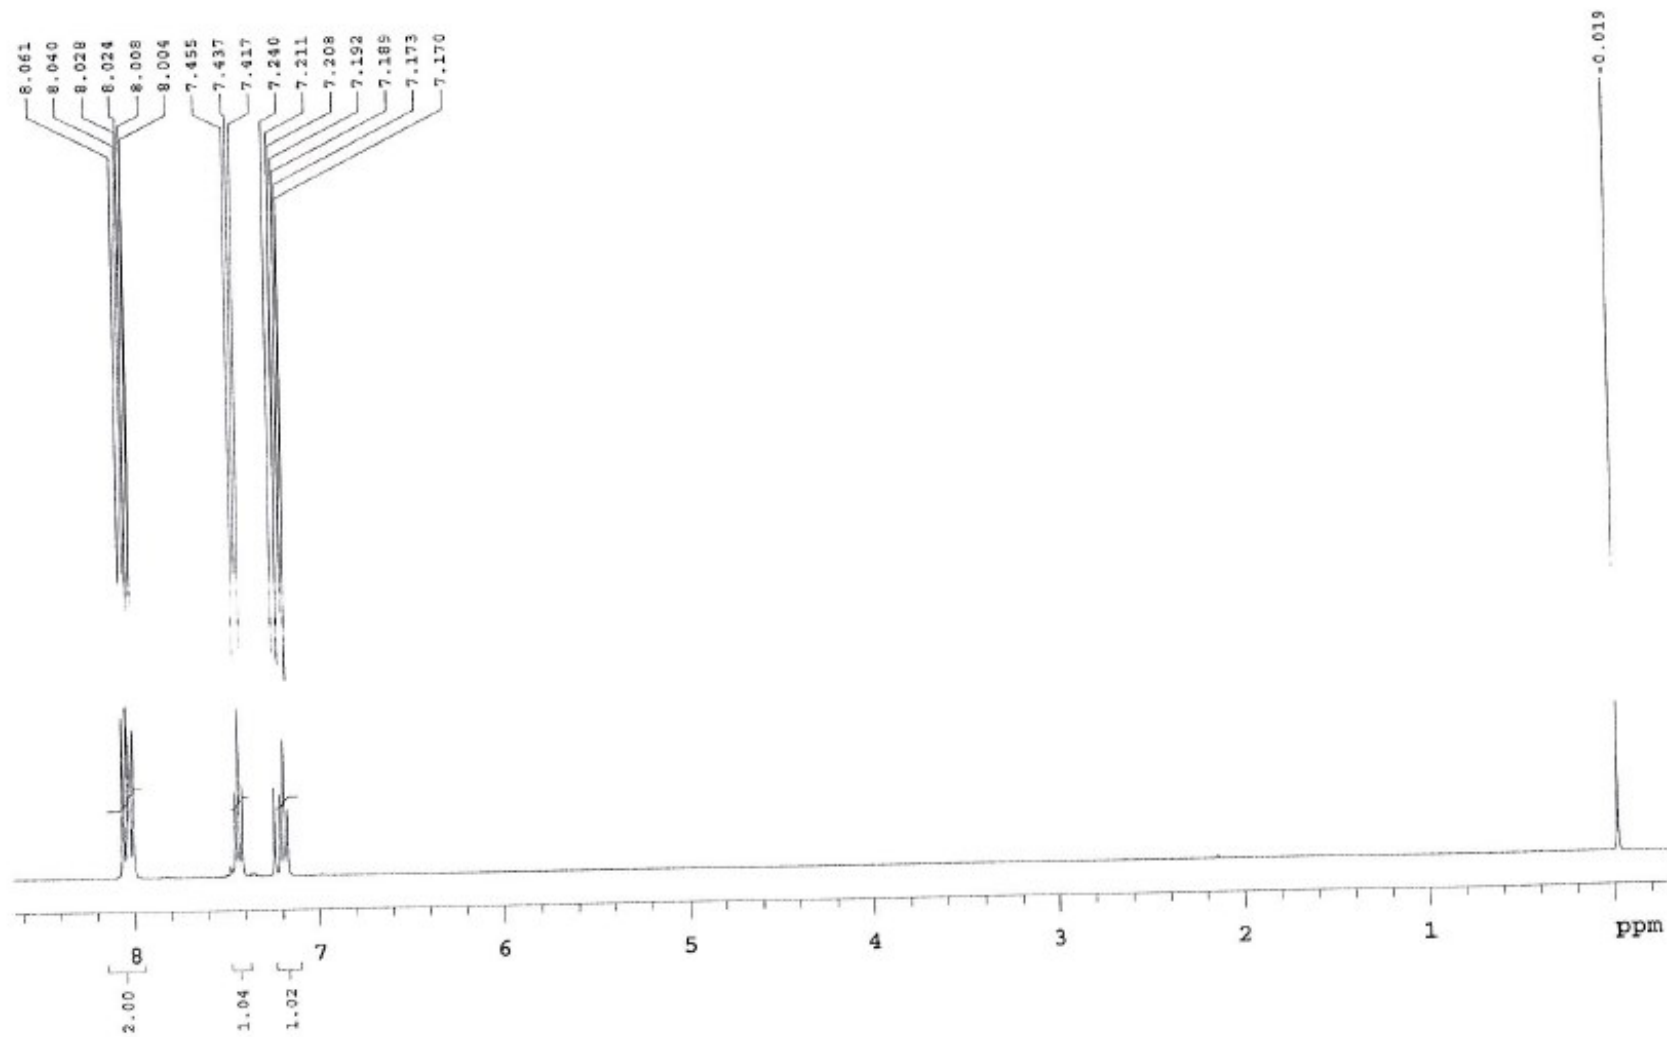

$^1\text{H}$  NMR spectrum of compound 3e in  $\text{DMSO-d}_6$

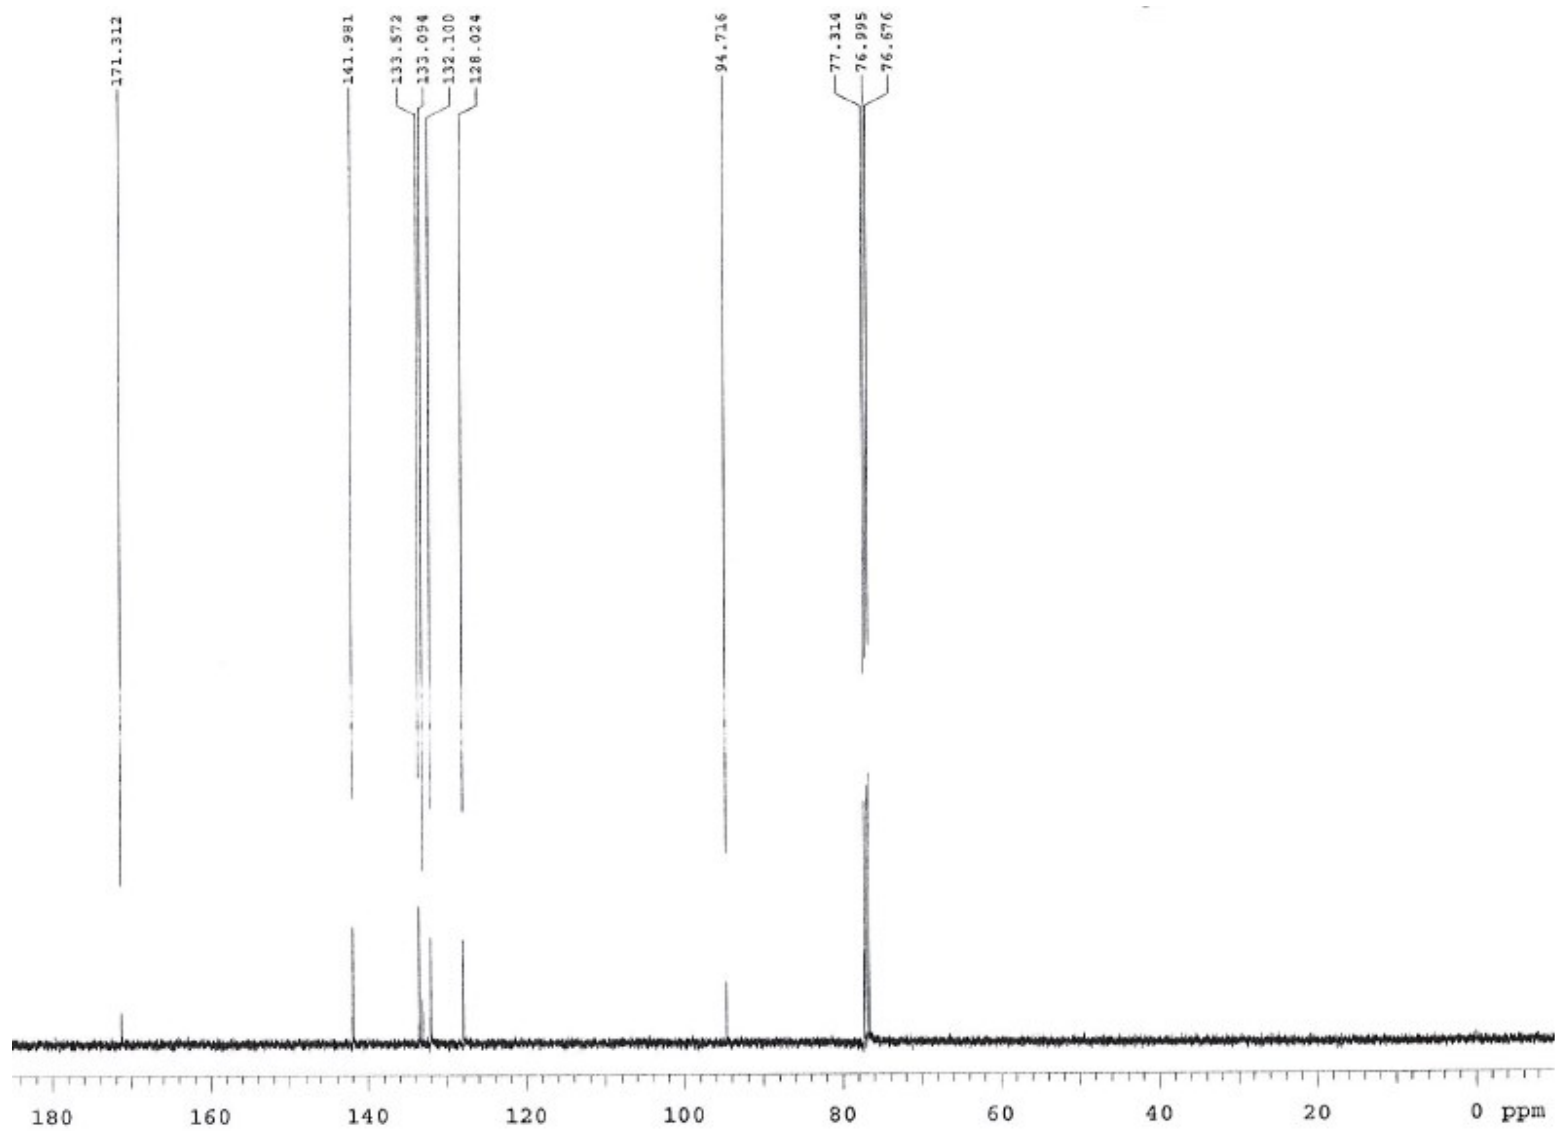

$^{13}\text{C}$  NMR spectrum of compound 3e in  $\text{DMSO-d}_6$

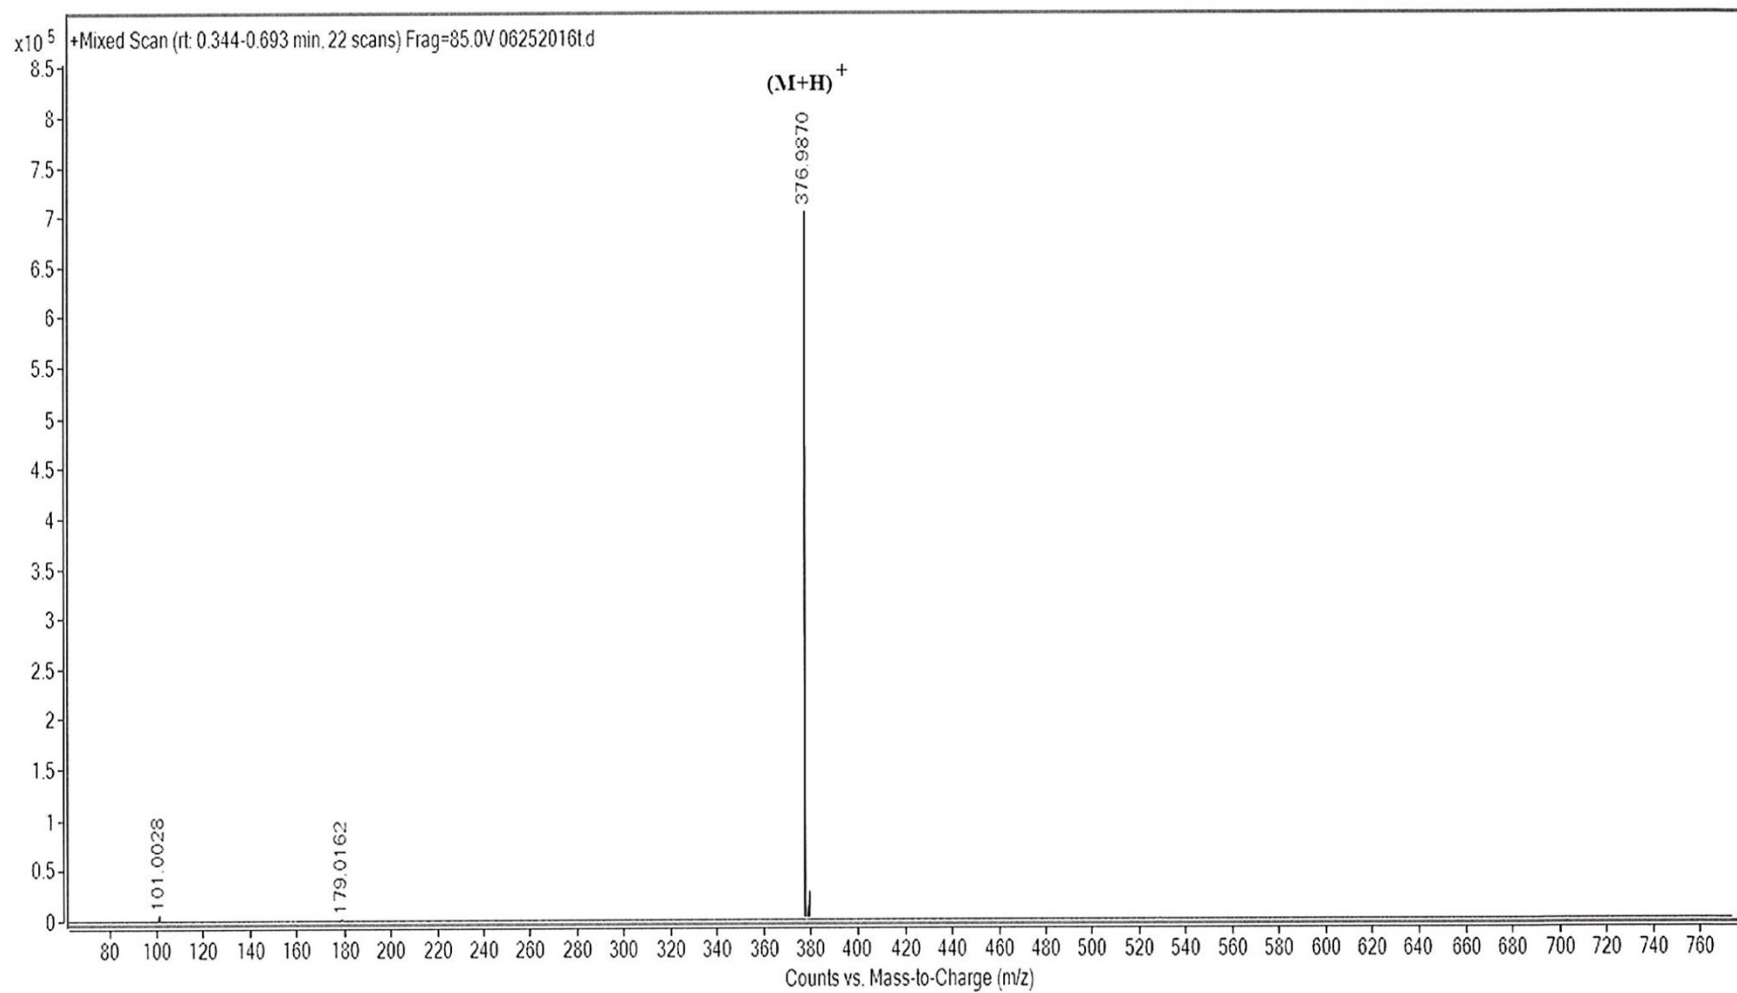

**HRMS spectrum of compound 3e**



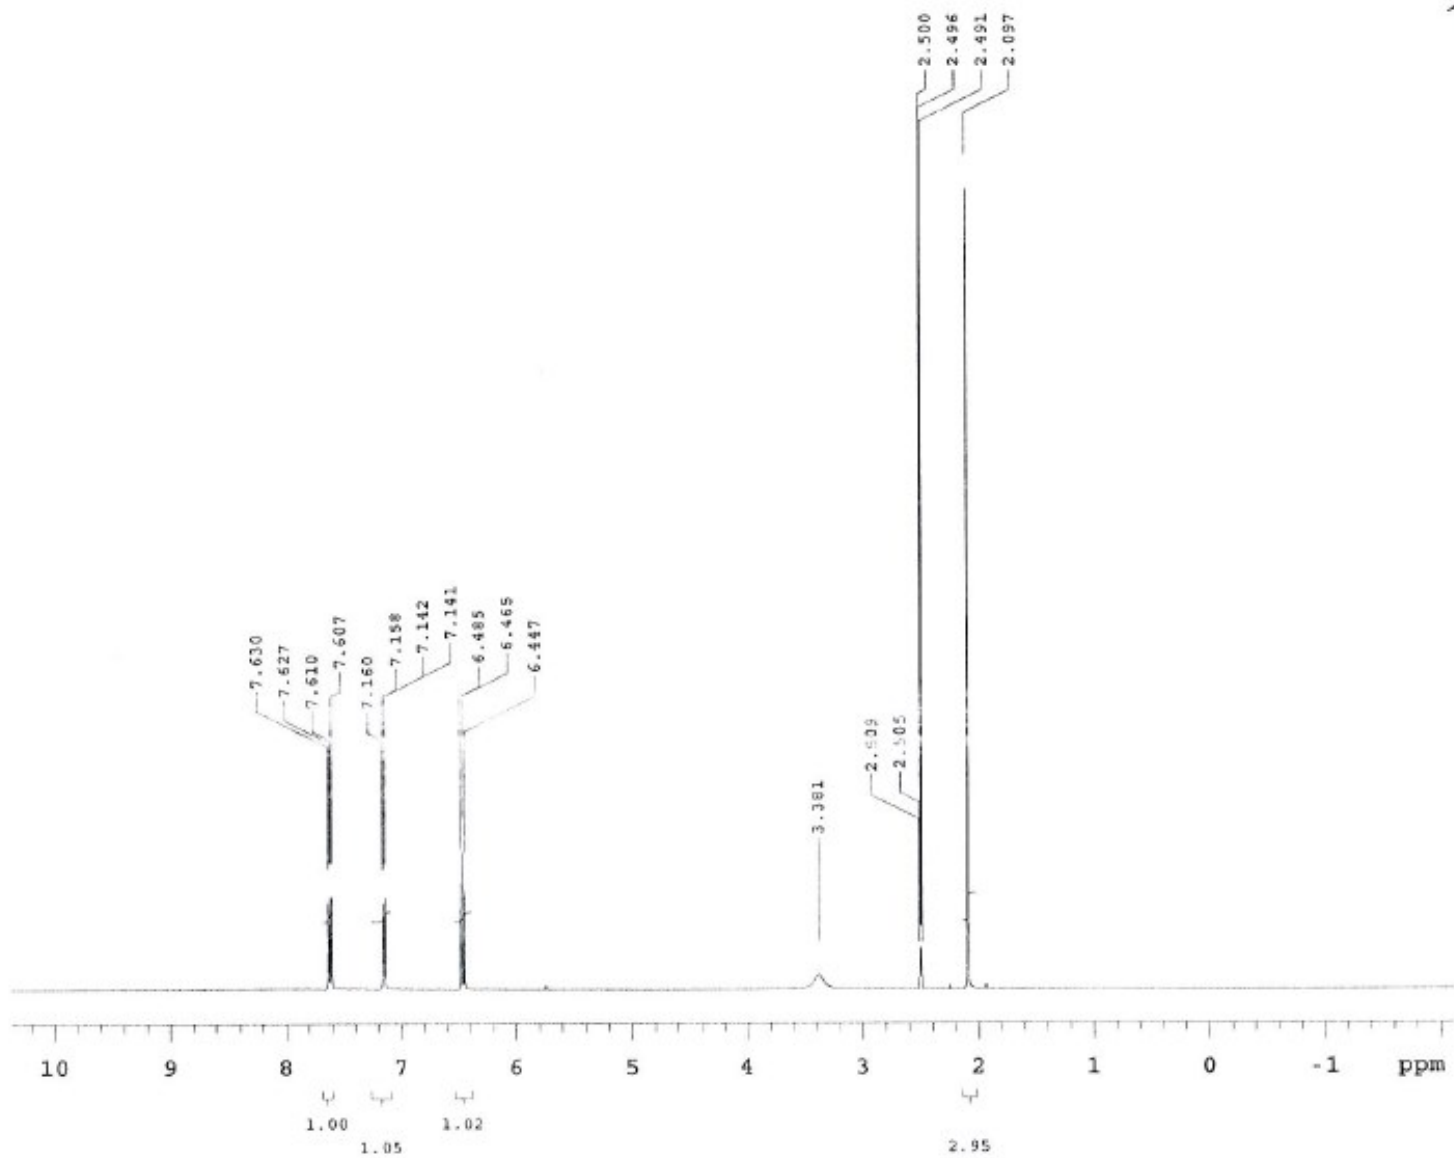

<sup>1</sup>H NMR spectrum of compound 3f in DMSO-d<sub>6</sub>

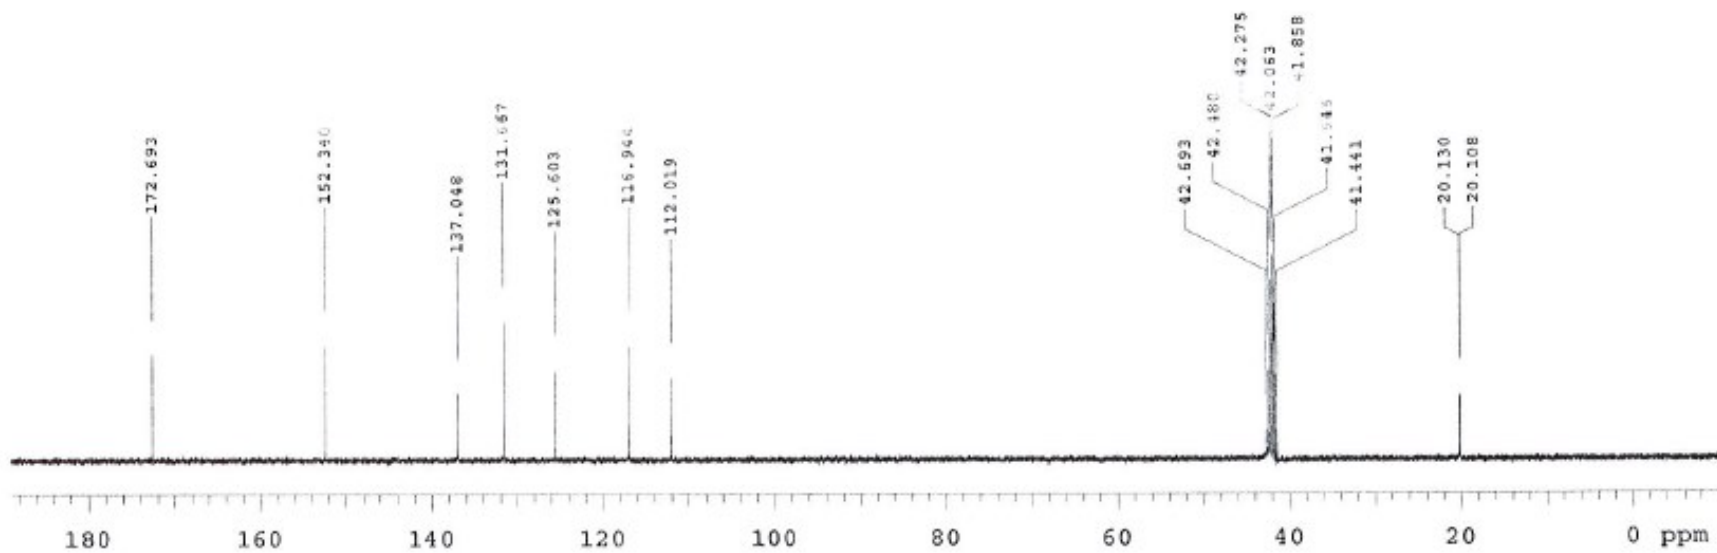

$^{13}\text{C}$  NMR spectrum of compound 3f in  $\text{DMSO-d}_6$

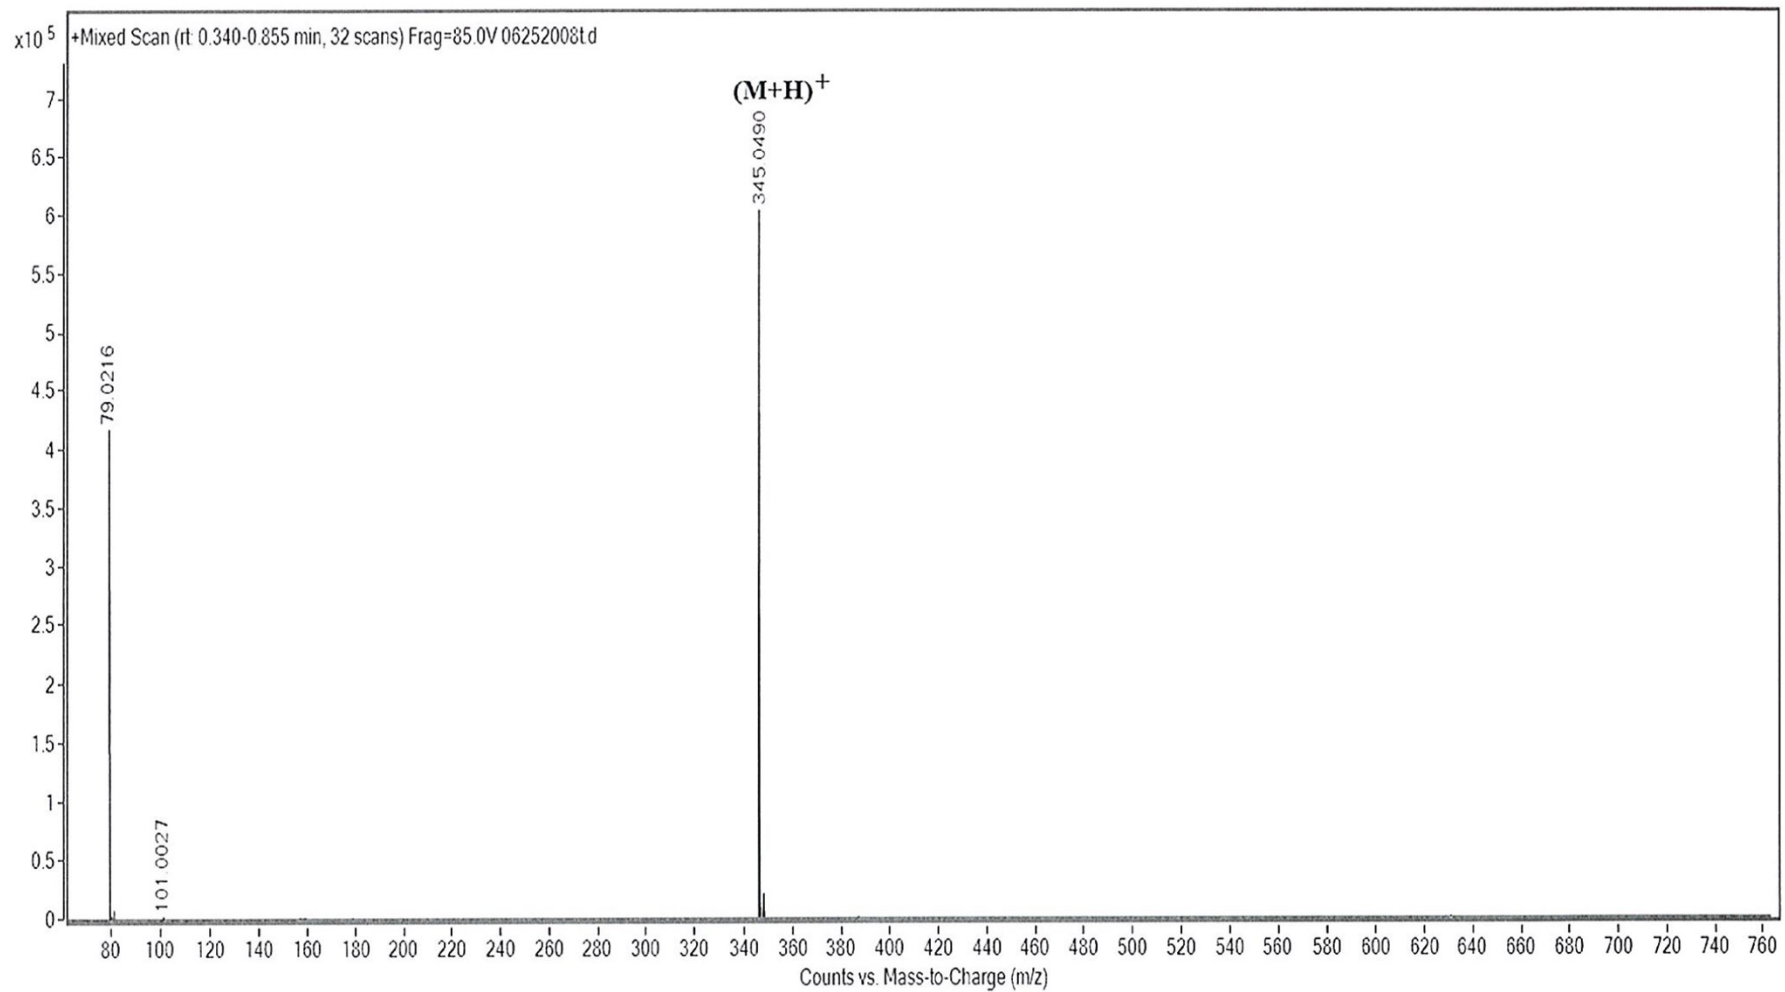

**HRMS spectrum of compound 3f**

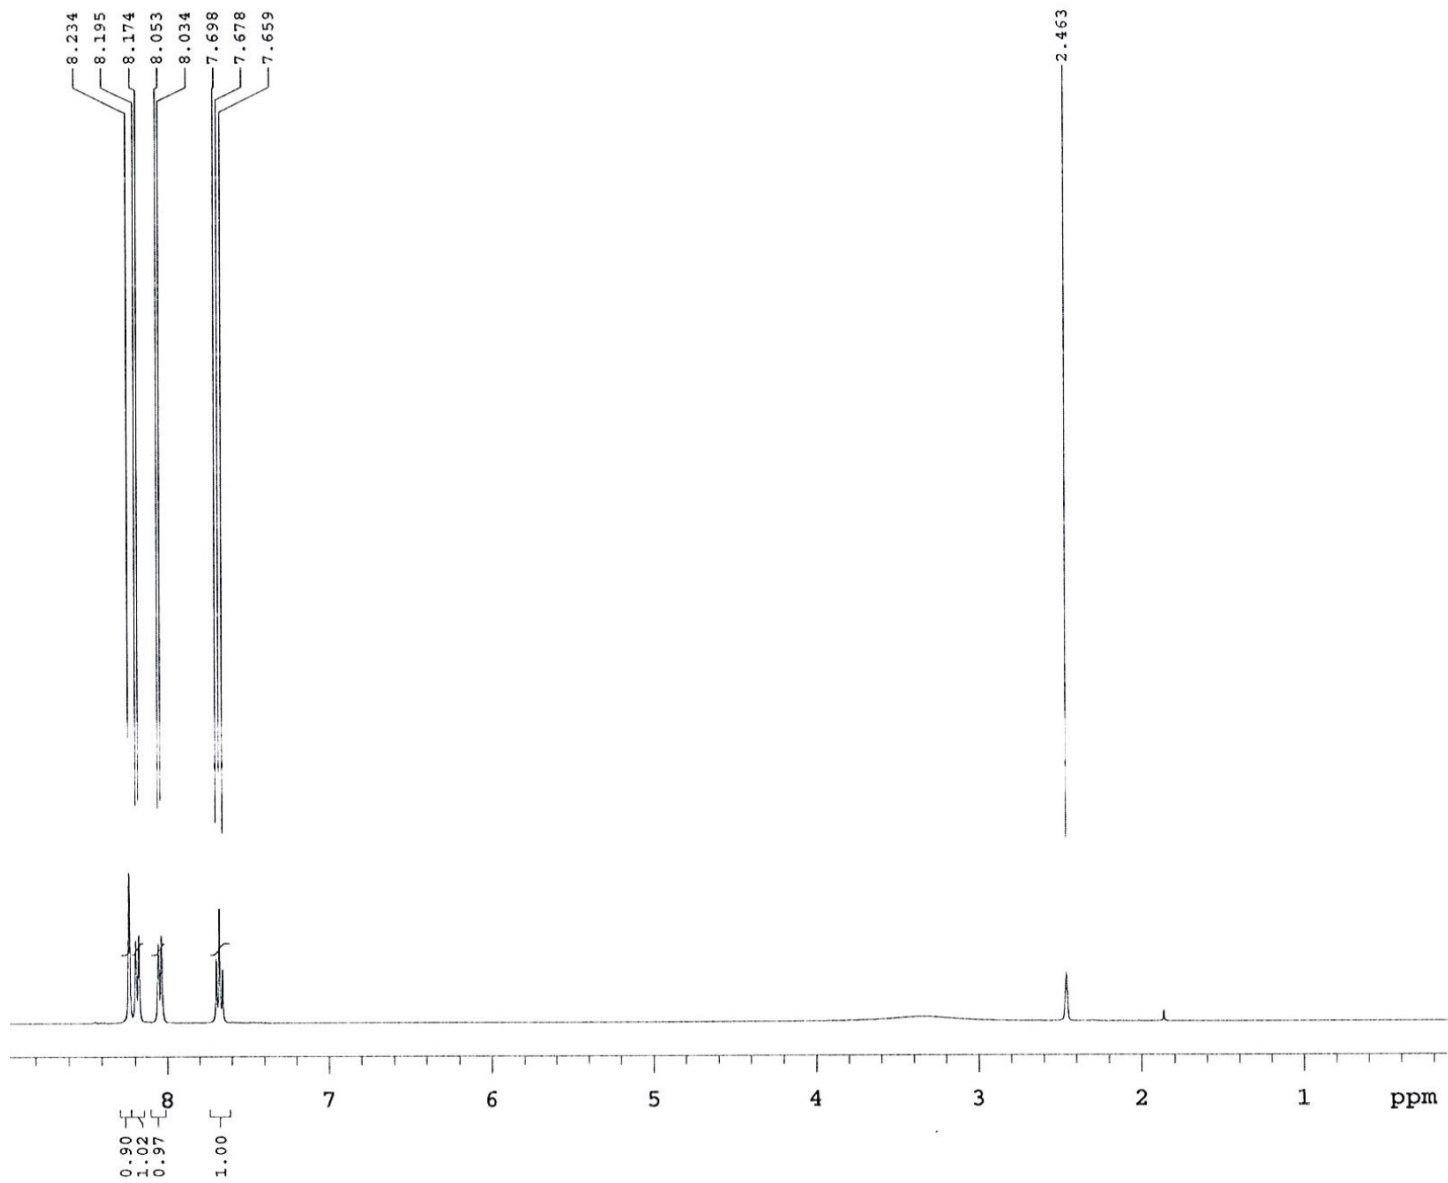

<sup>1</sup>H NMR spectrum of compound 3g in DMSO-d<sub>6</sub>

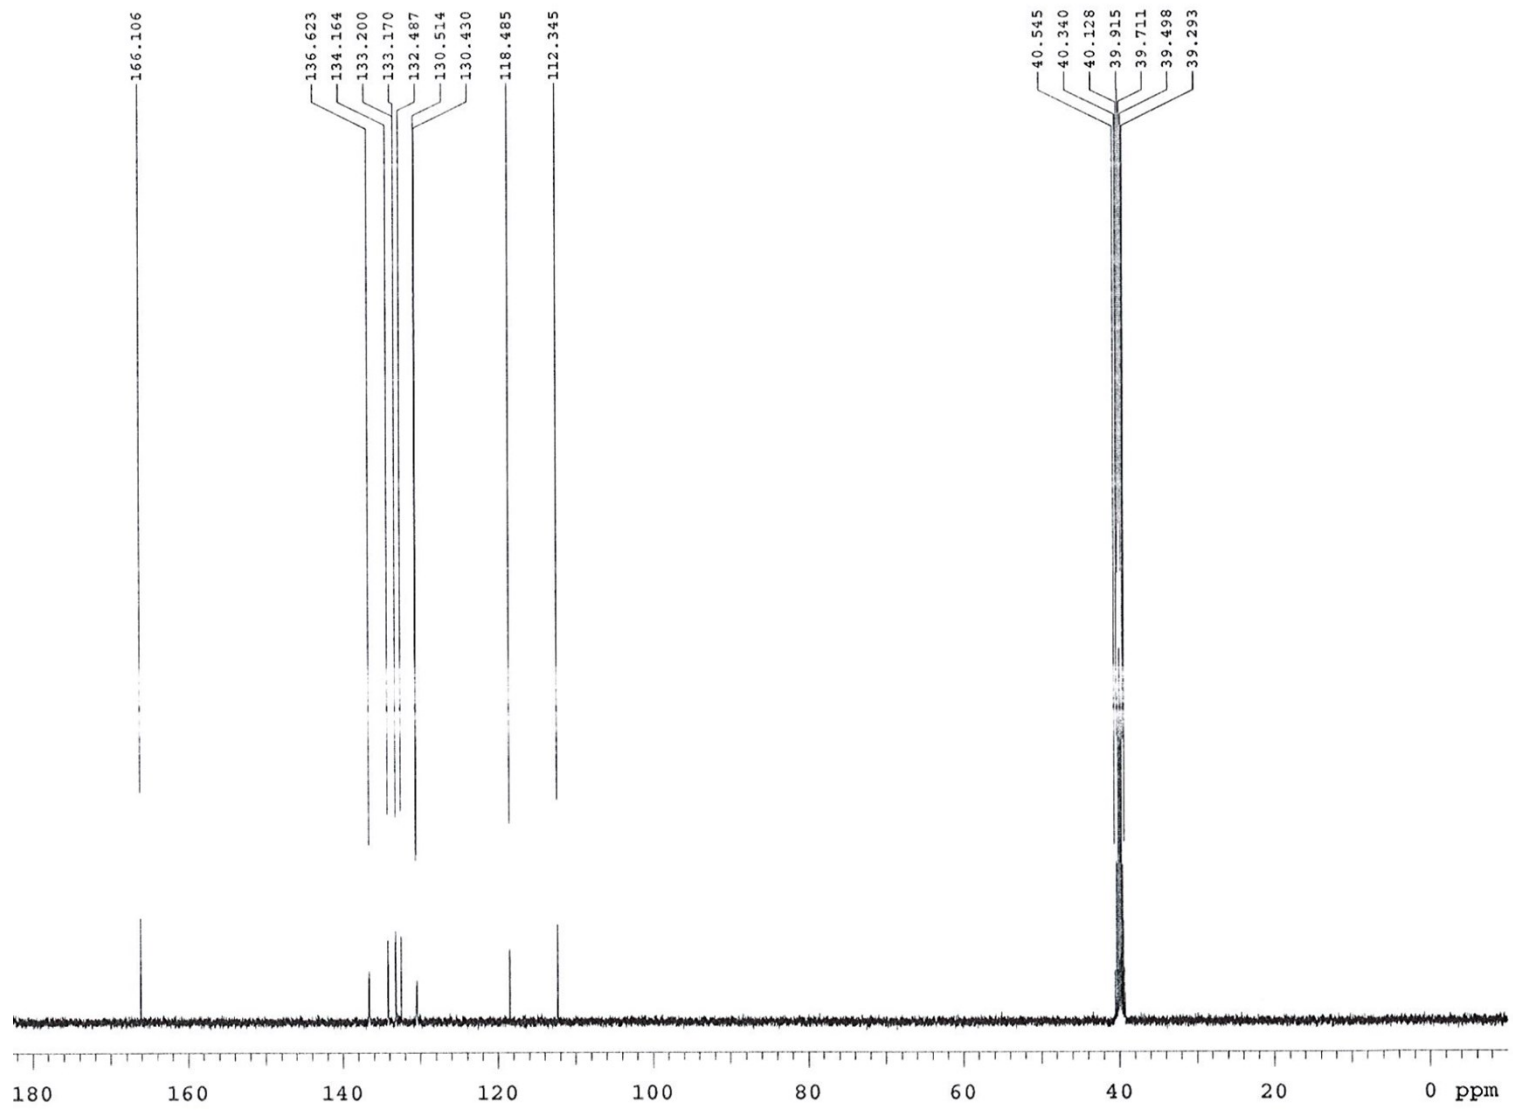

**$^{13}\text{C}$  NMR spectrum of compound 3g in  $\text{DMSO-d}_6$**

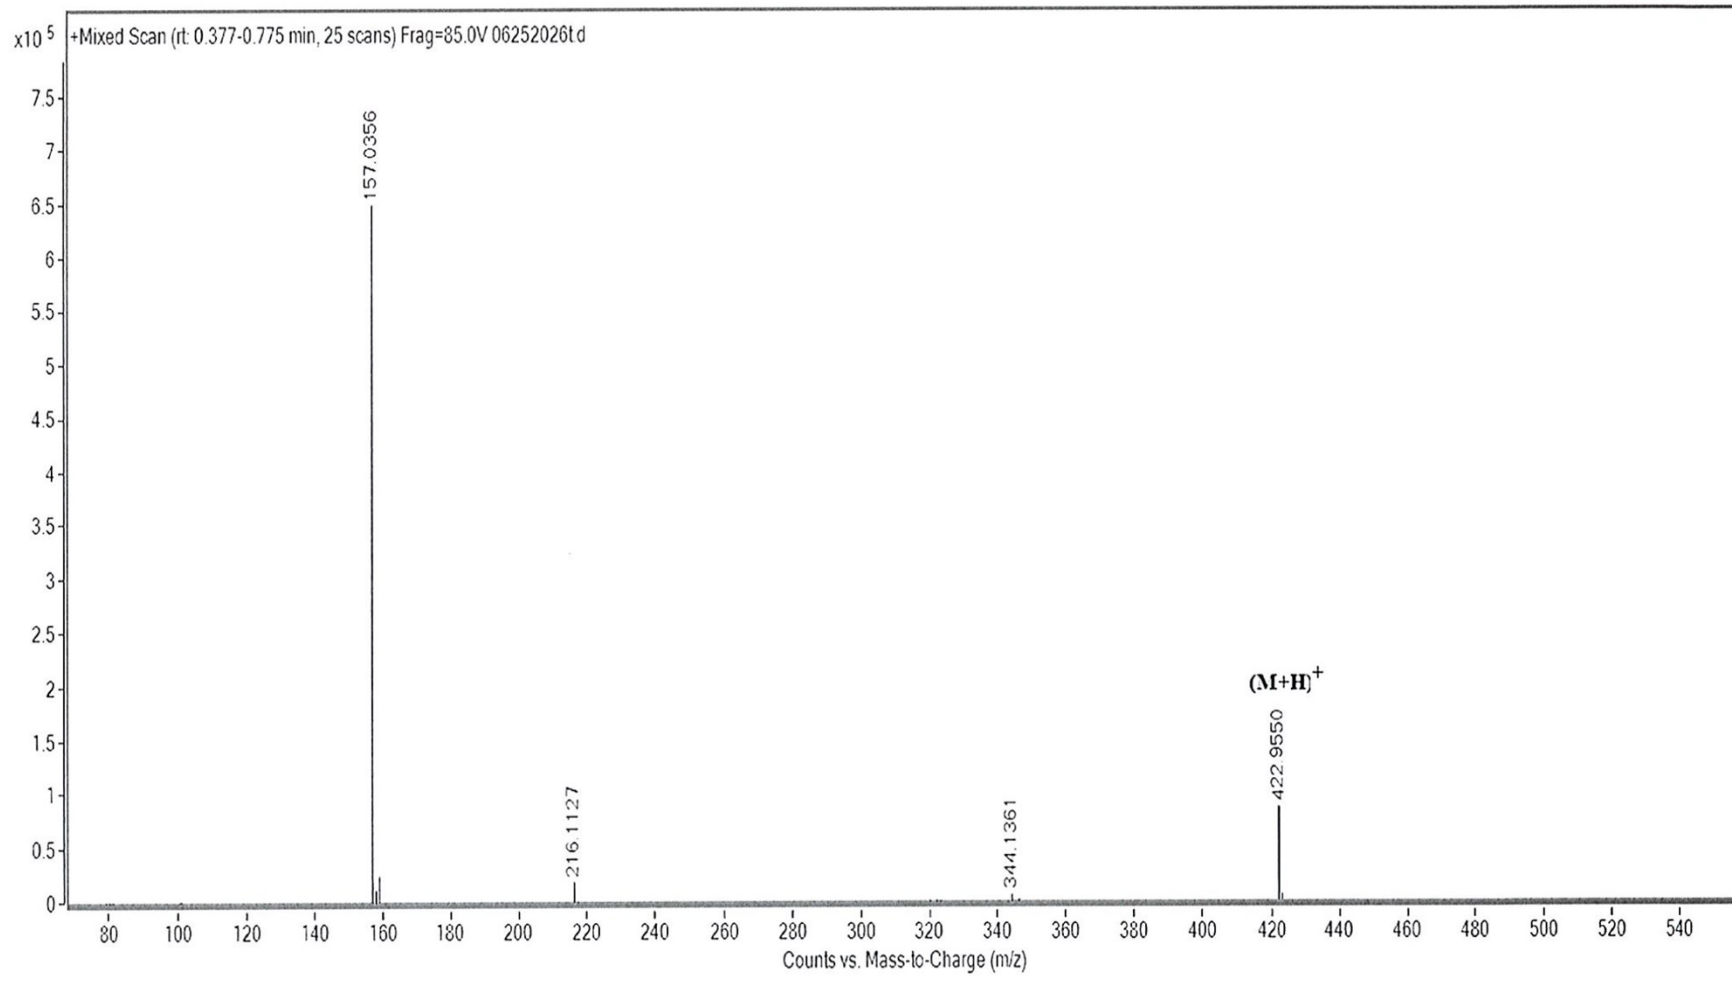

HRMS spectrum of compound 3g

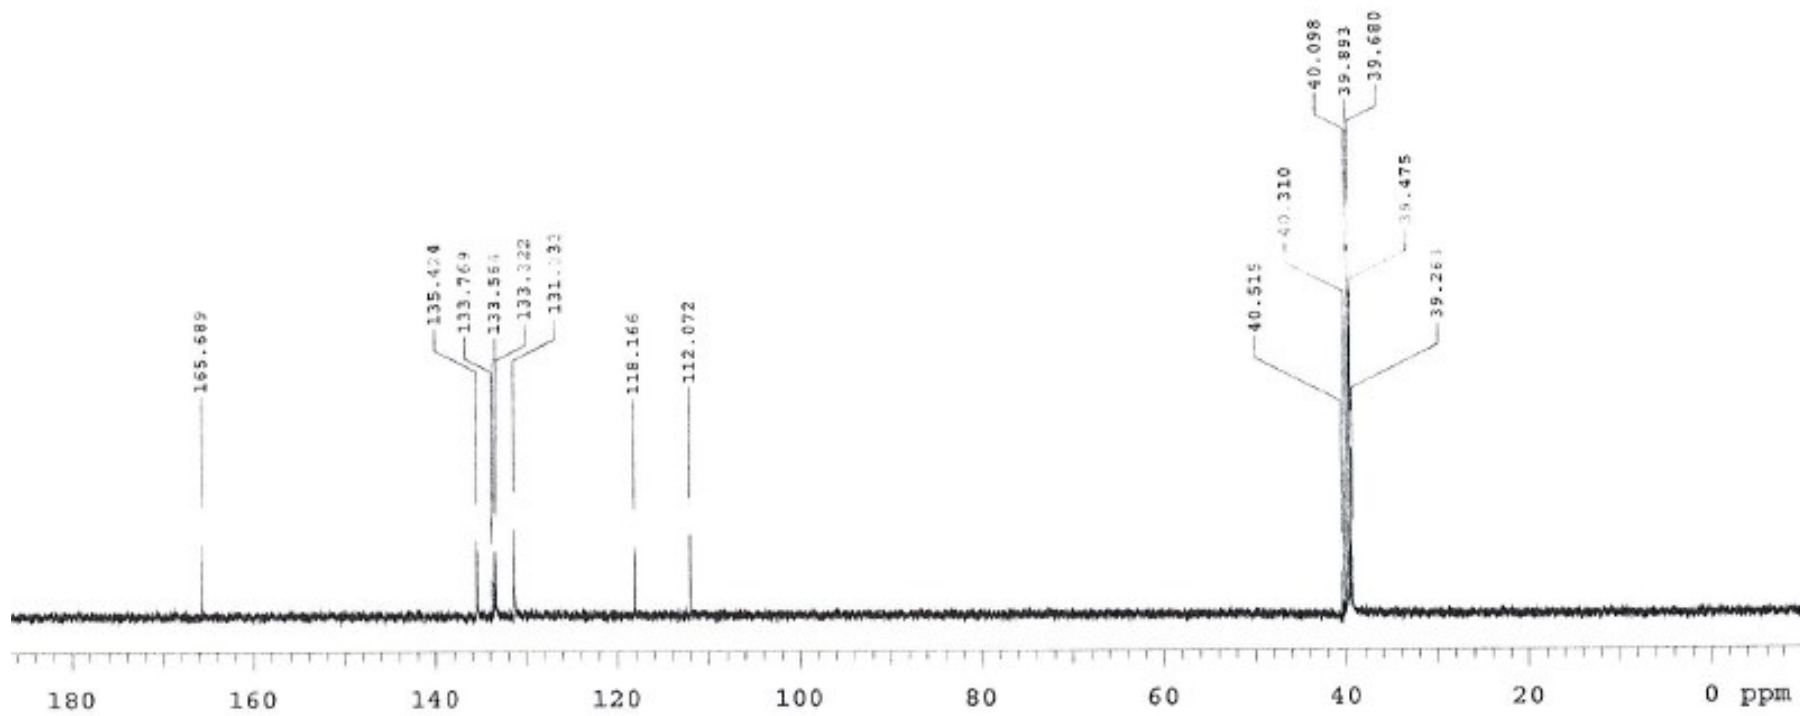

<sup>1</sup>H NMR spectrum of compound 3h in DMSO-d<sub>6</sub>

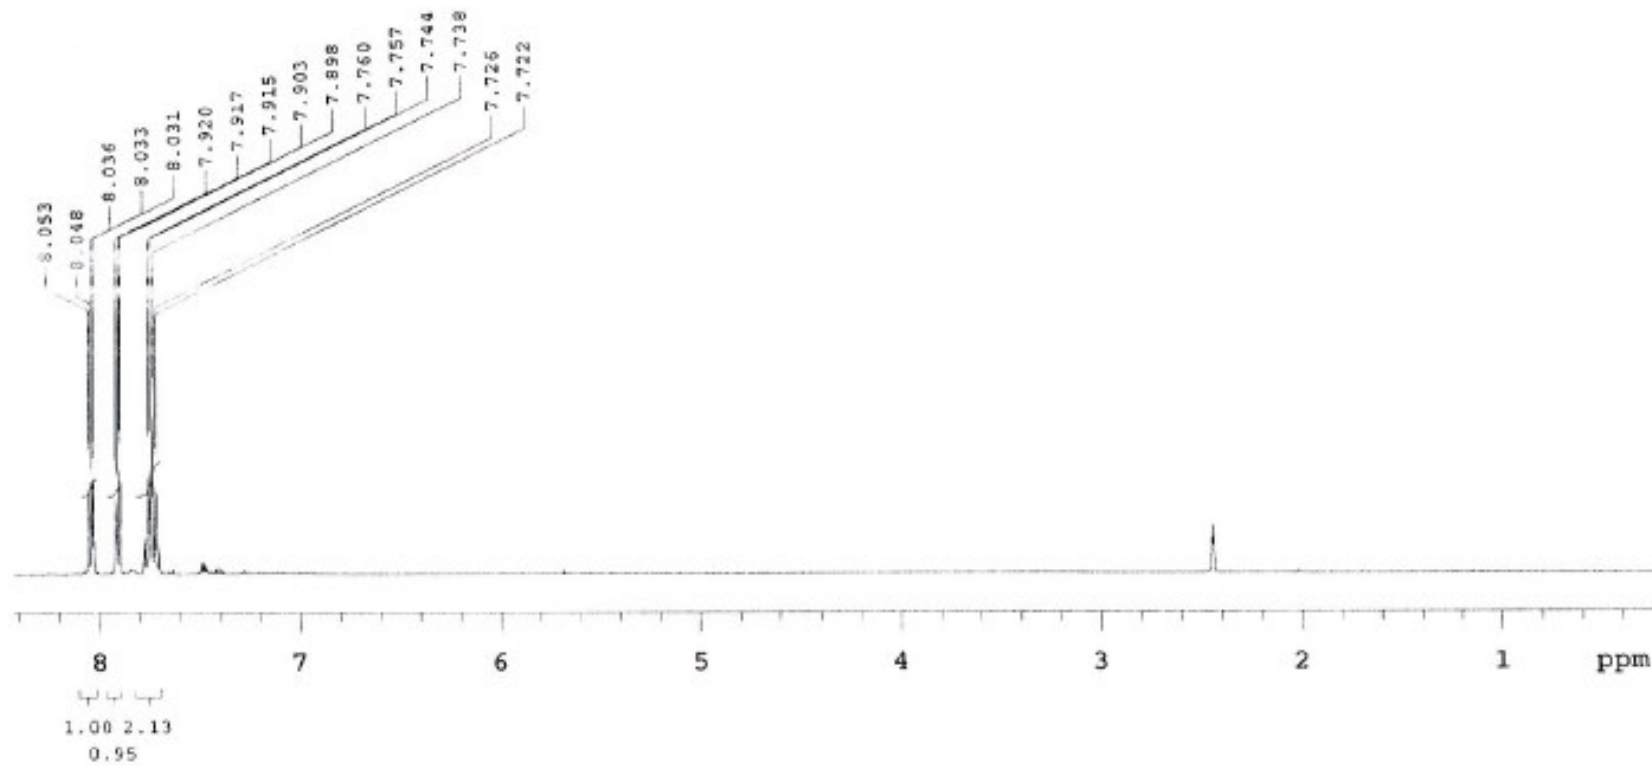

<sup>13</sup>C NMR spectrum of compound 3h in DMSO-d<sub>6</sub>



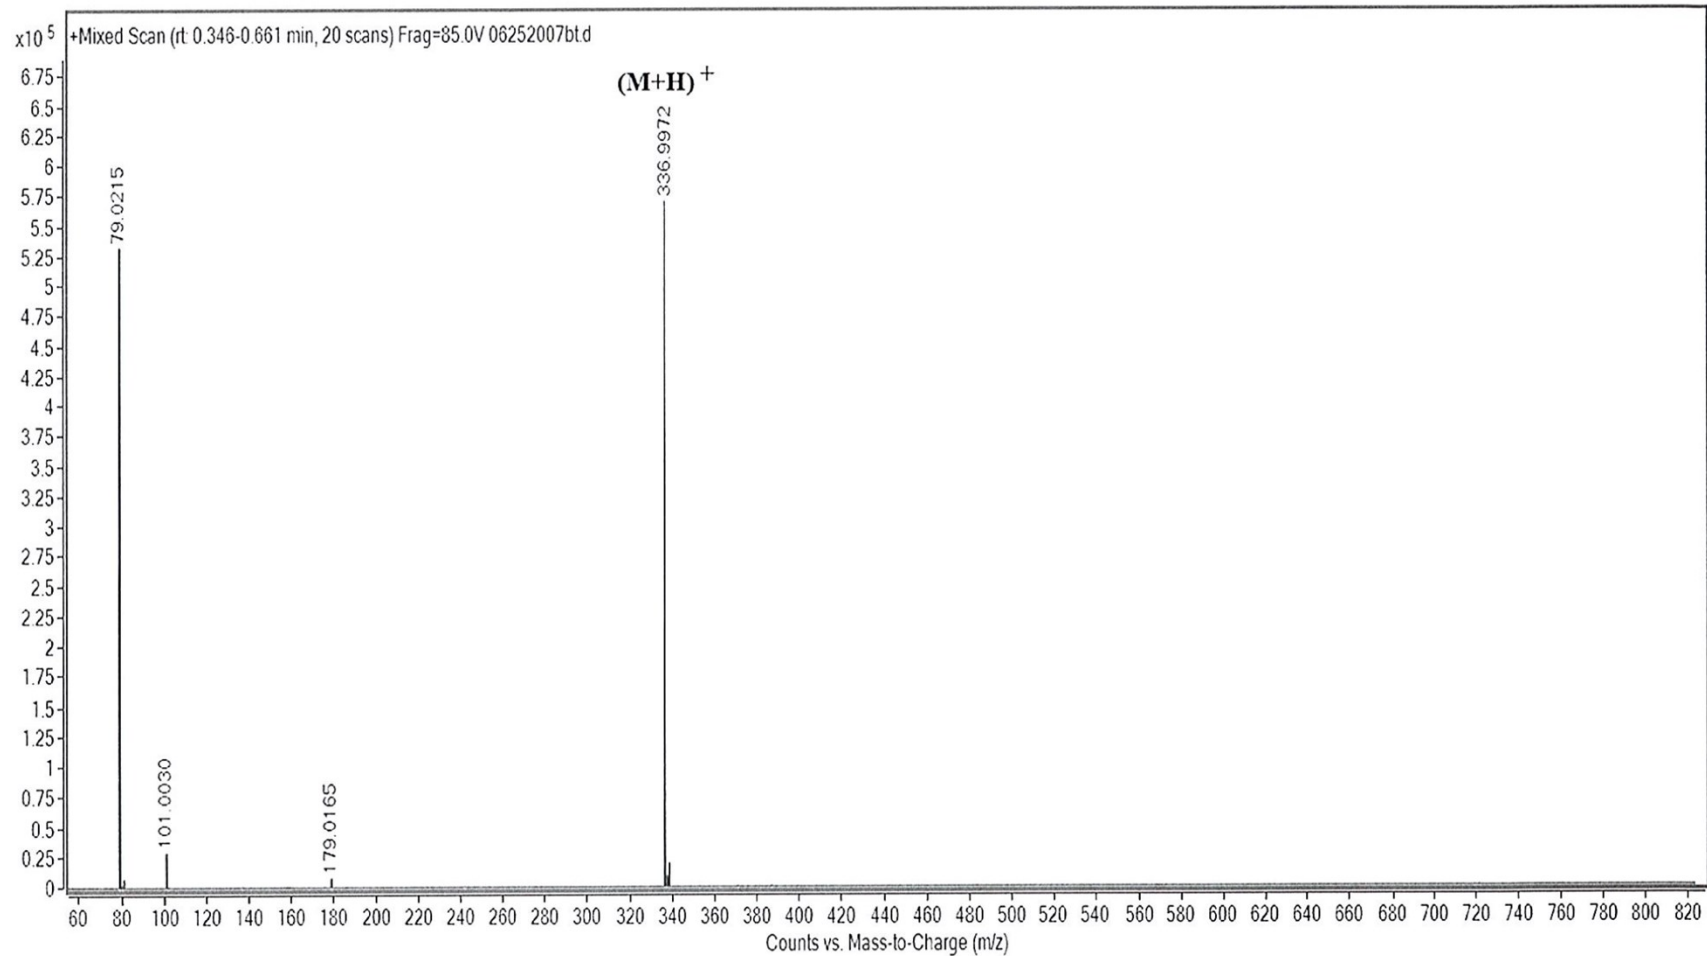

HRMS spectrum of compound 3h

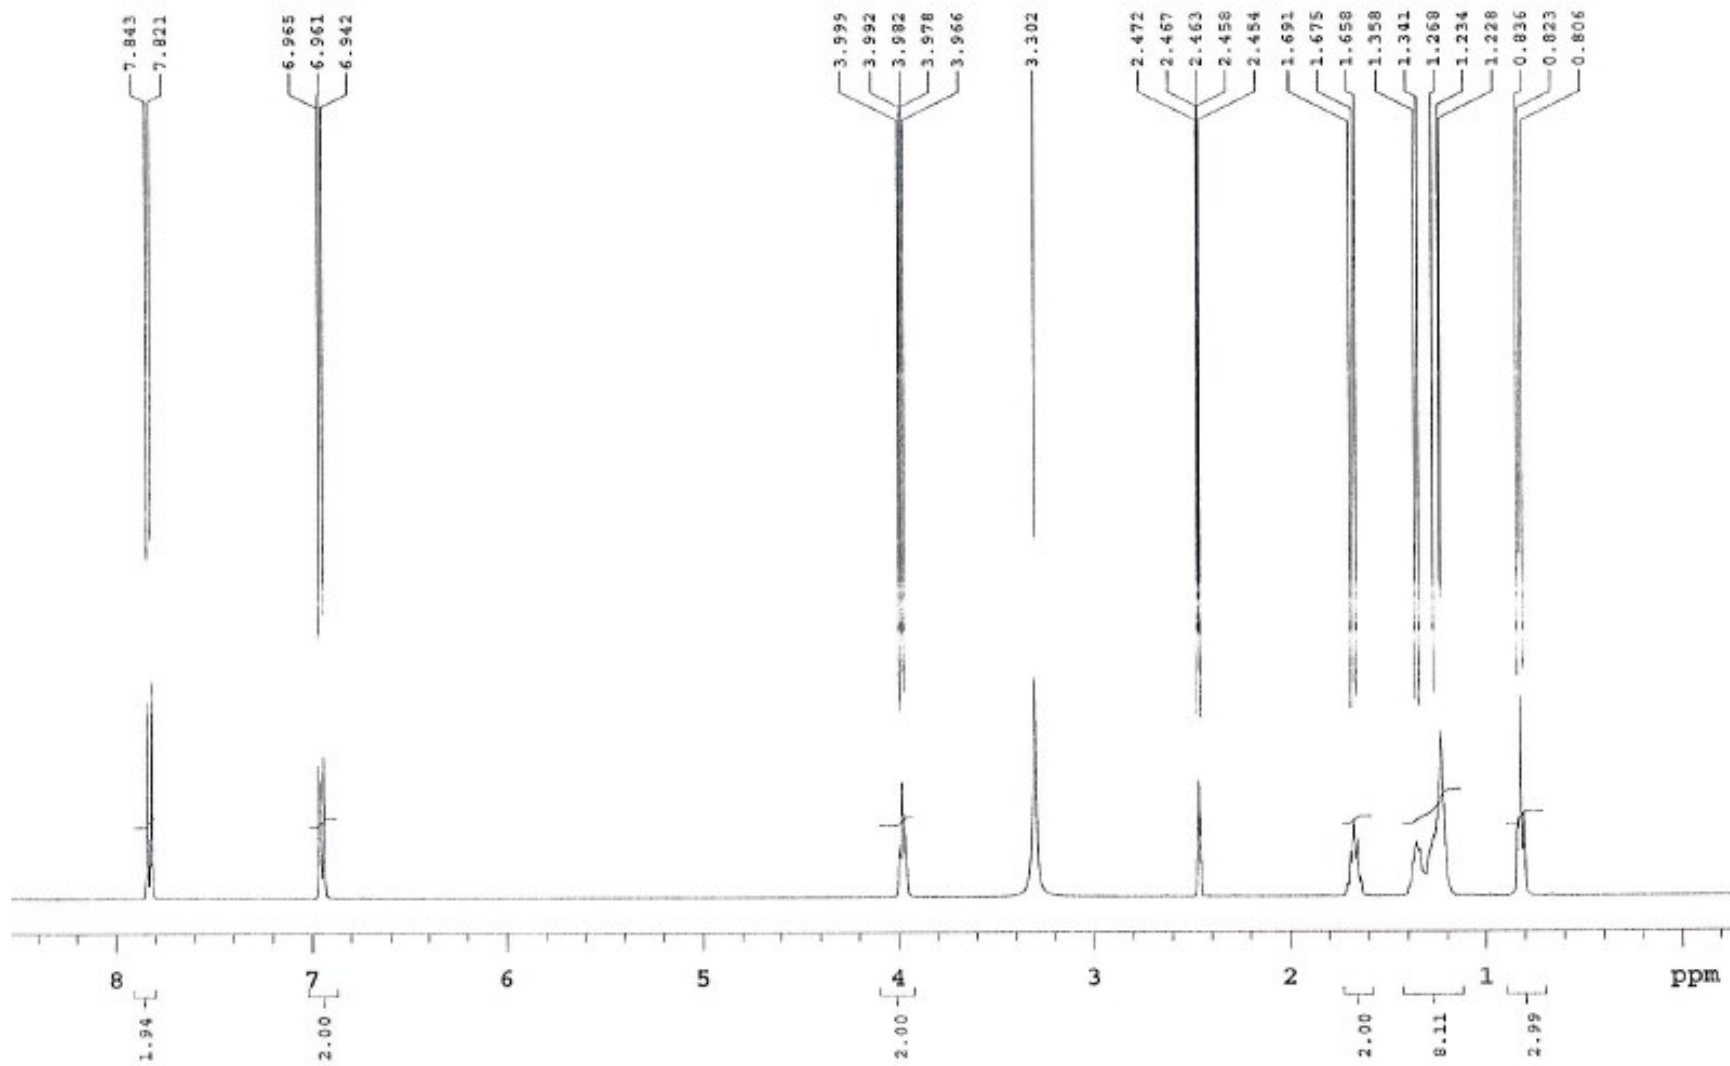

<sup>1</sup>H NMR spectrum of compound 3i in DMSO-d<sub>6</sub>

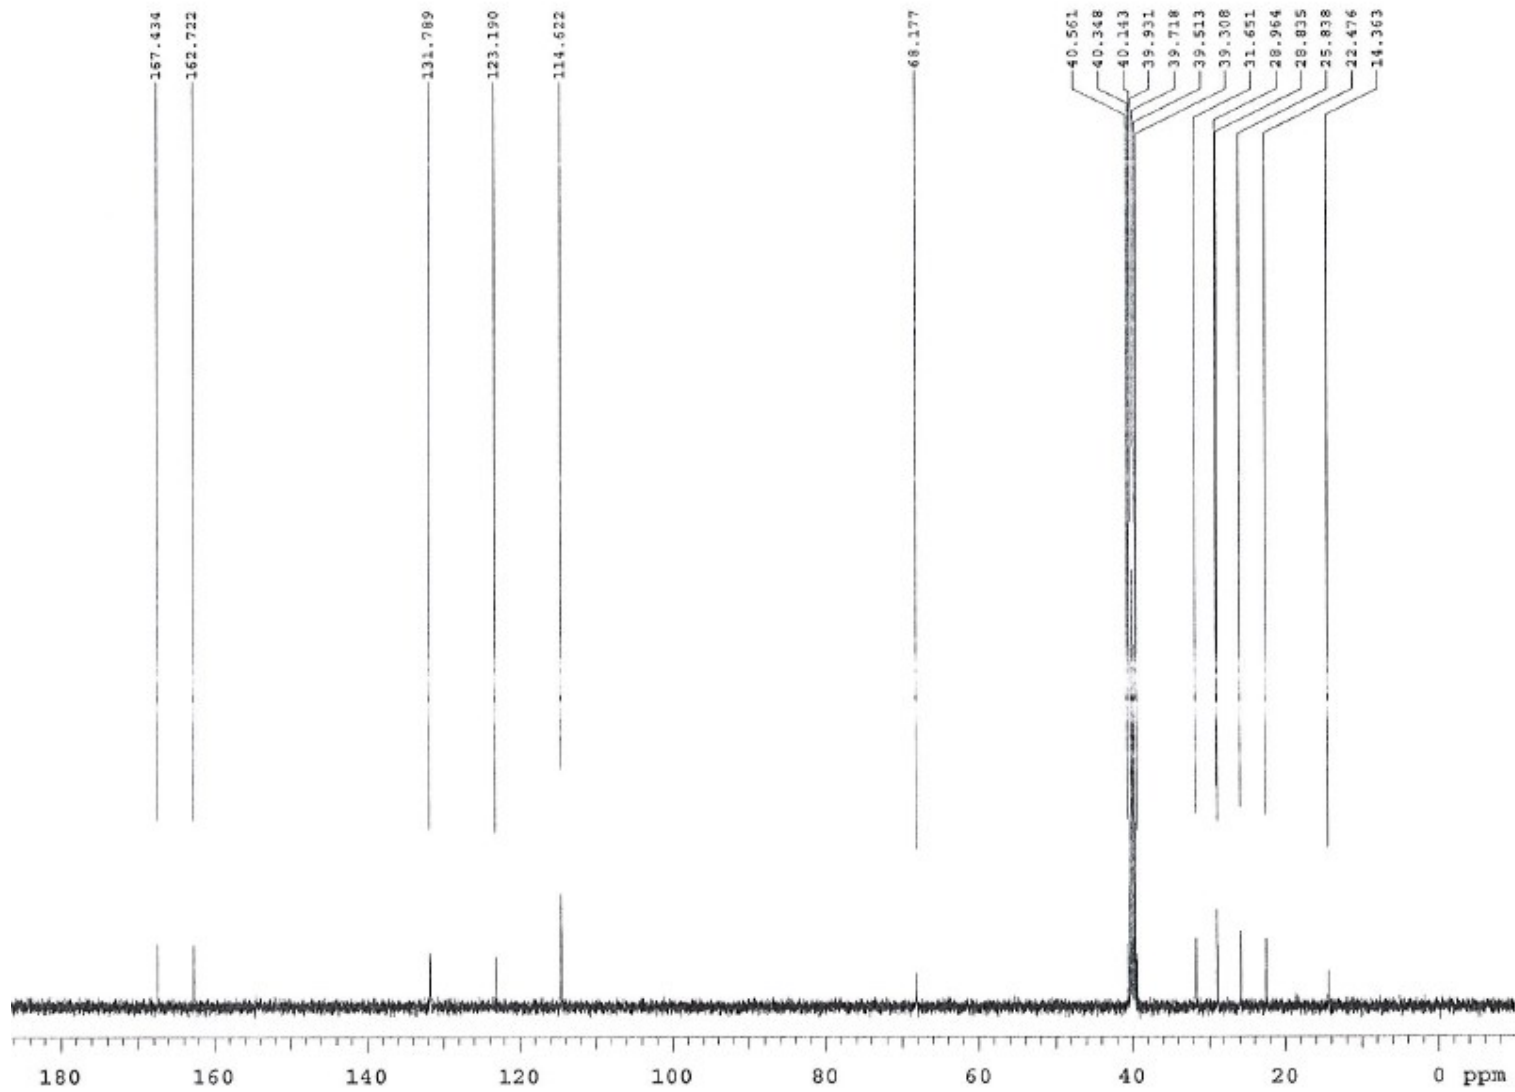

$^{13}\text{C}$  NMR spectrum of compound 3i in  $\text{DMSO-d}_6$

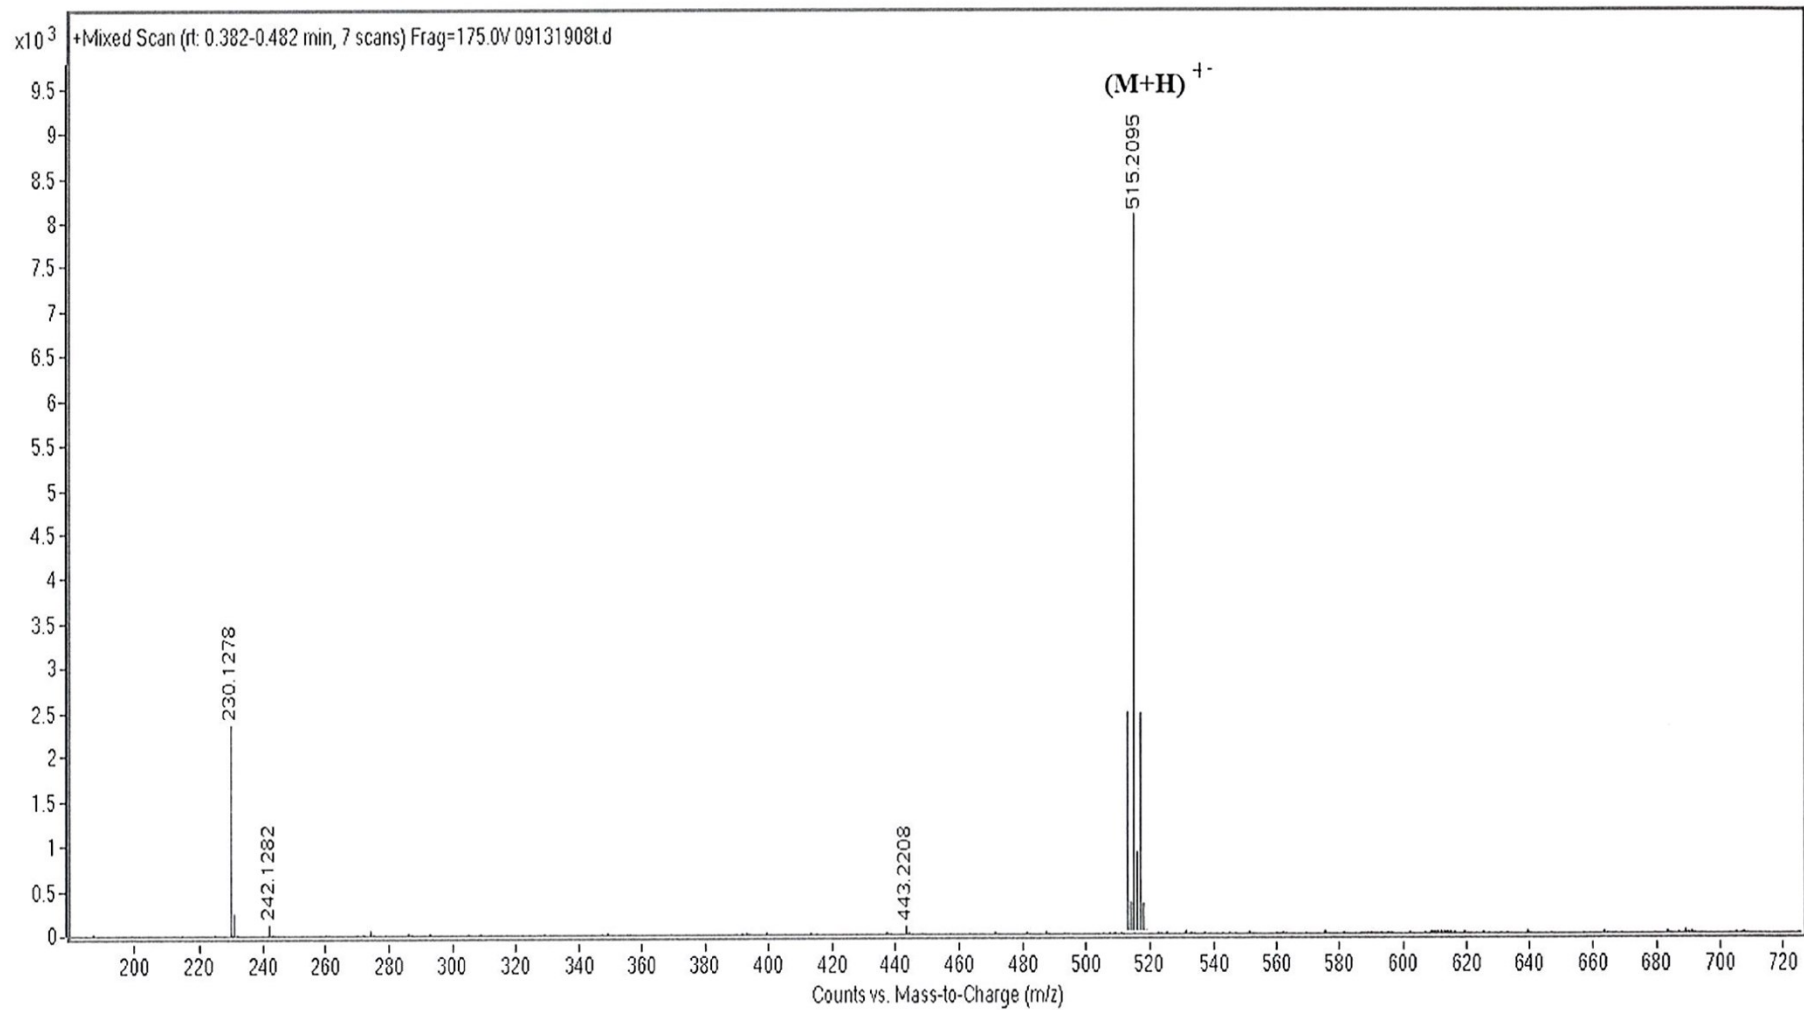

HRMS spectrum of compound 3i

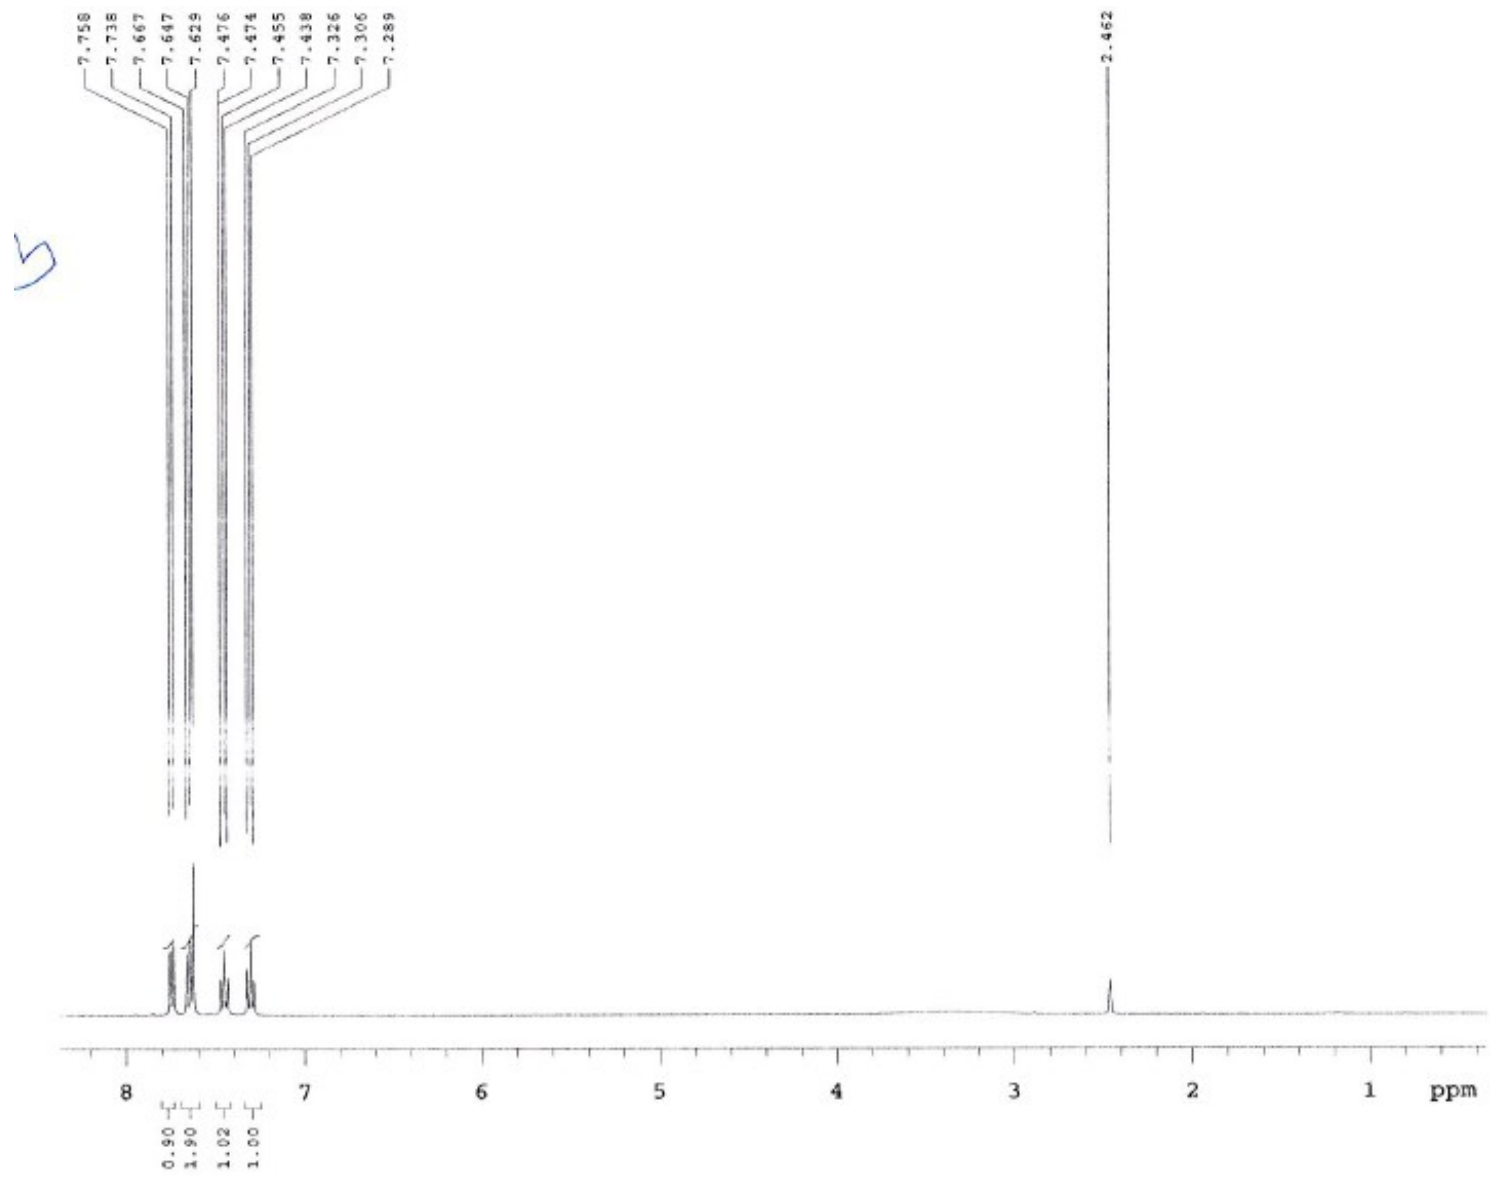

<sup>1</sup>H NMR spectrum of compound 3j in DMSO-d<sub>6</sub>

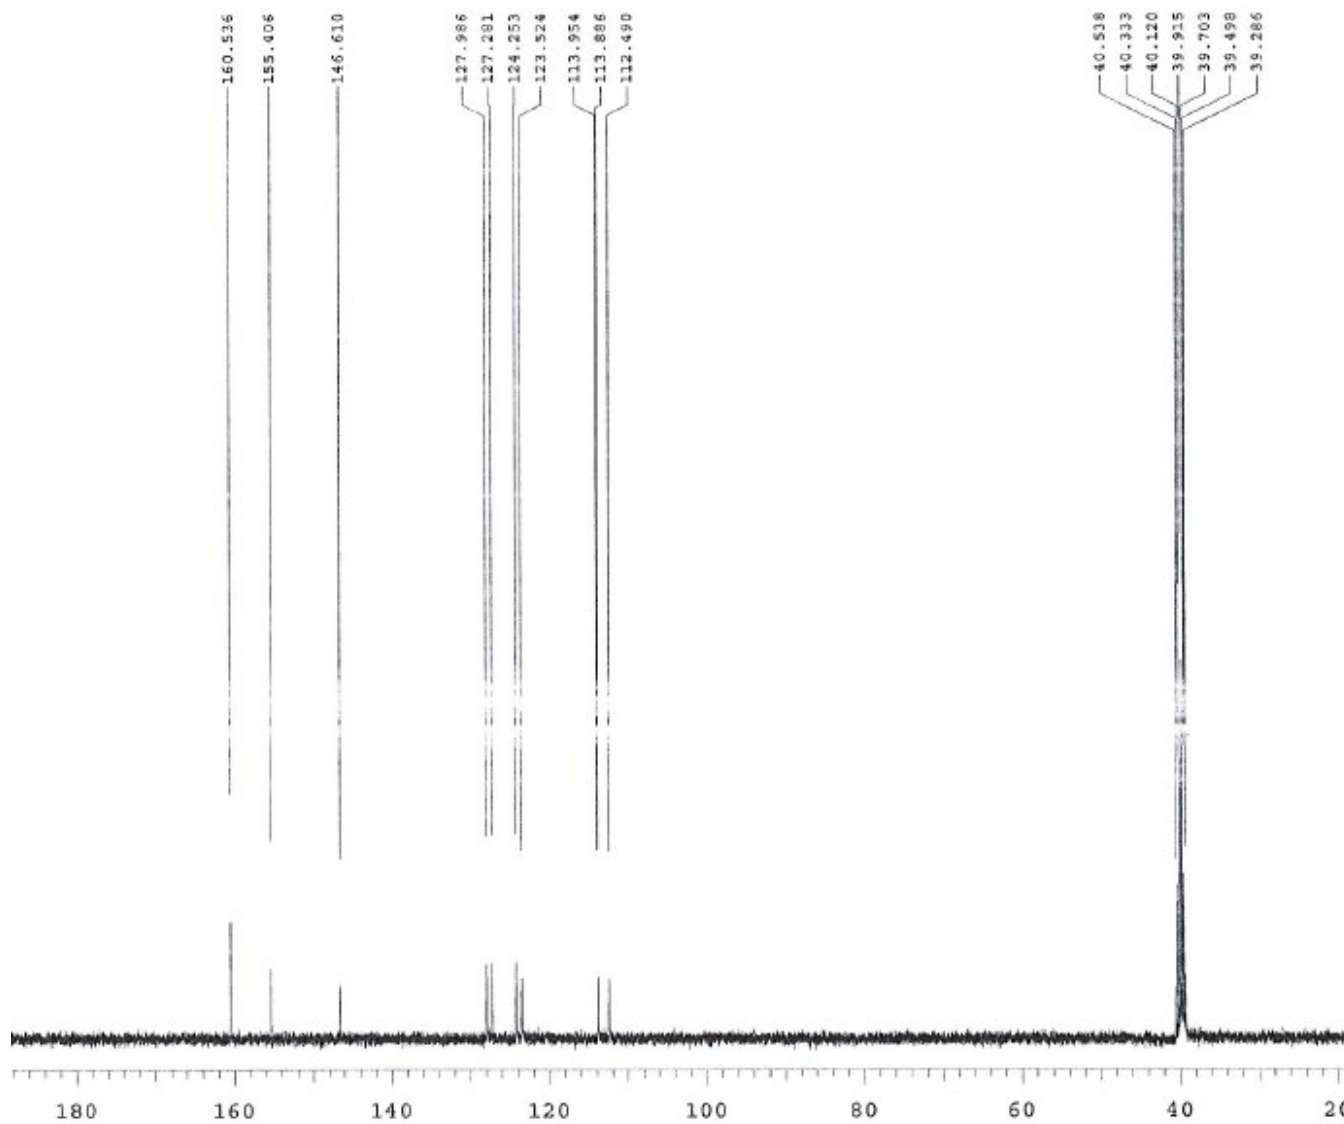

$^{13}\text{C}$  NMR spectrum of compound 3j in  $\text{DMSO-d}_6$

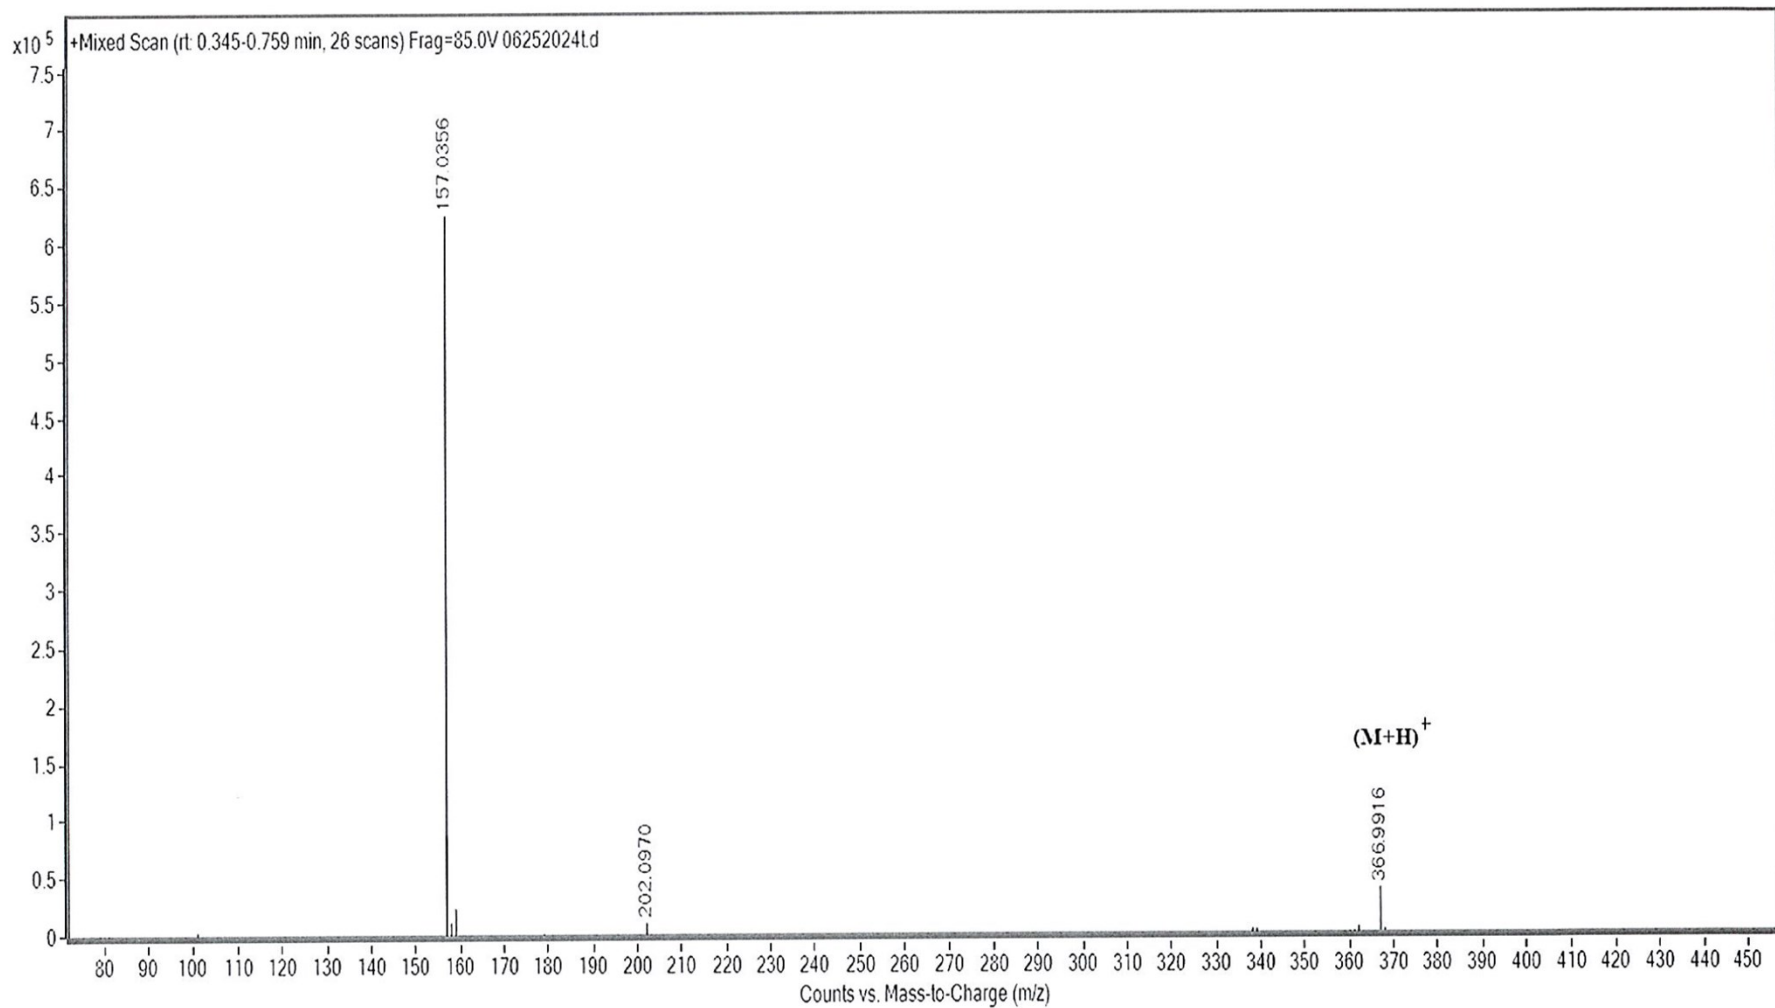

**HRMS spectrum of compound 3j**

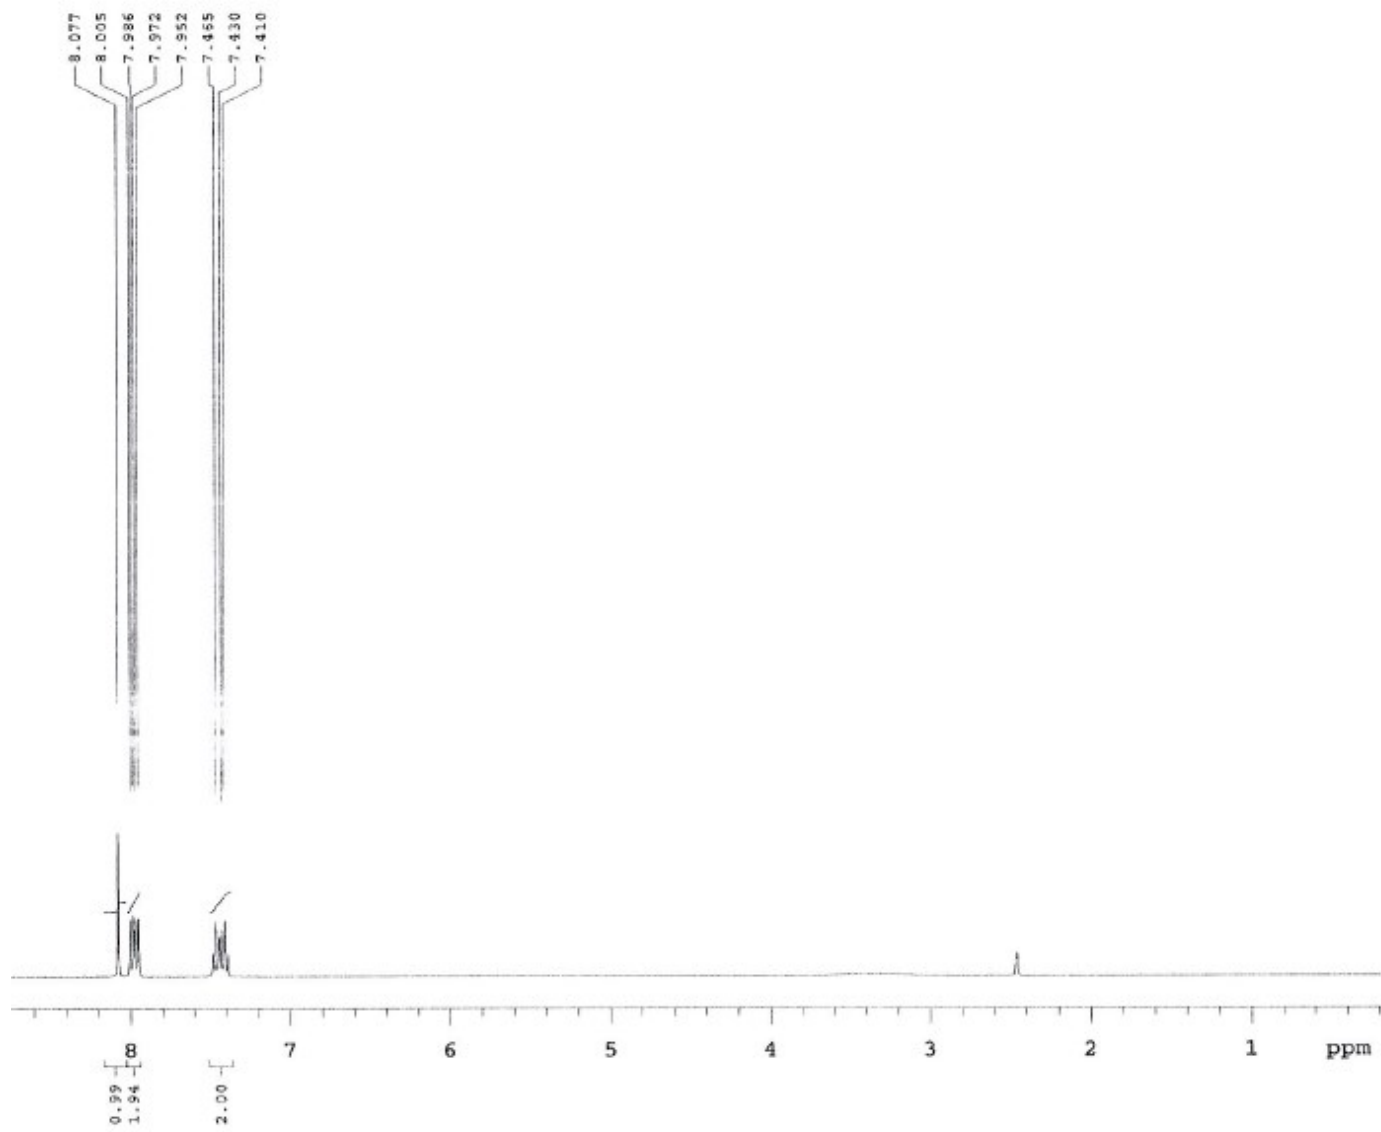

$^1\text{H}$  NMR spectrum of compound 3k in  $\text{DMSO-d}_6$



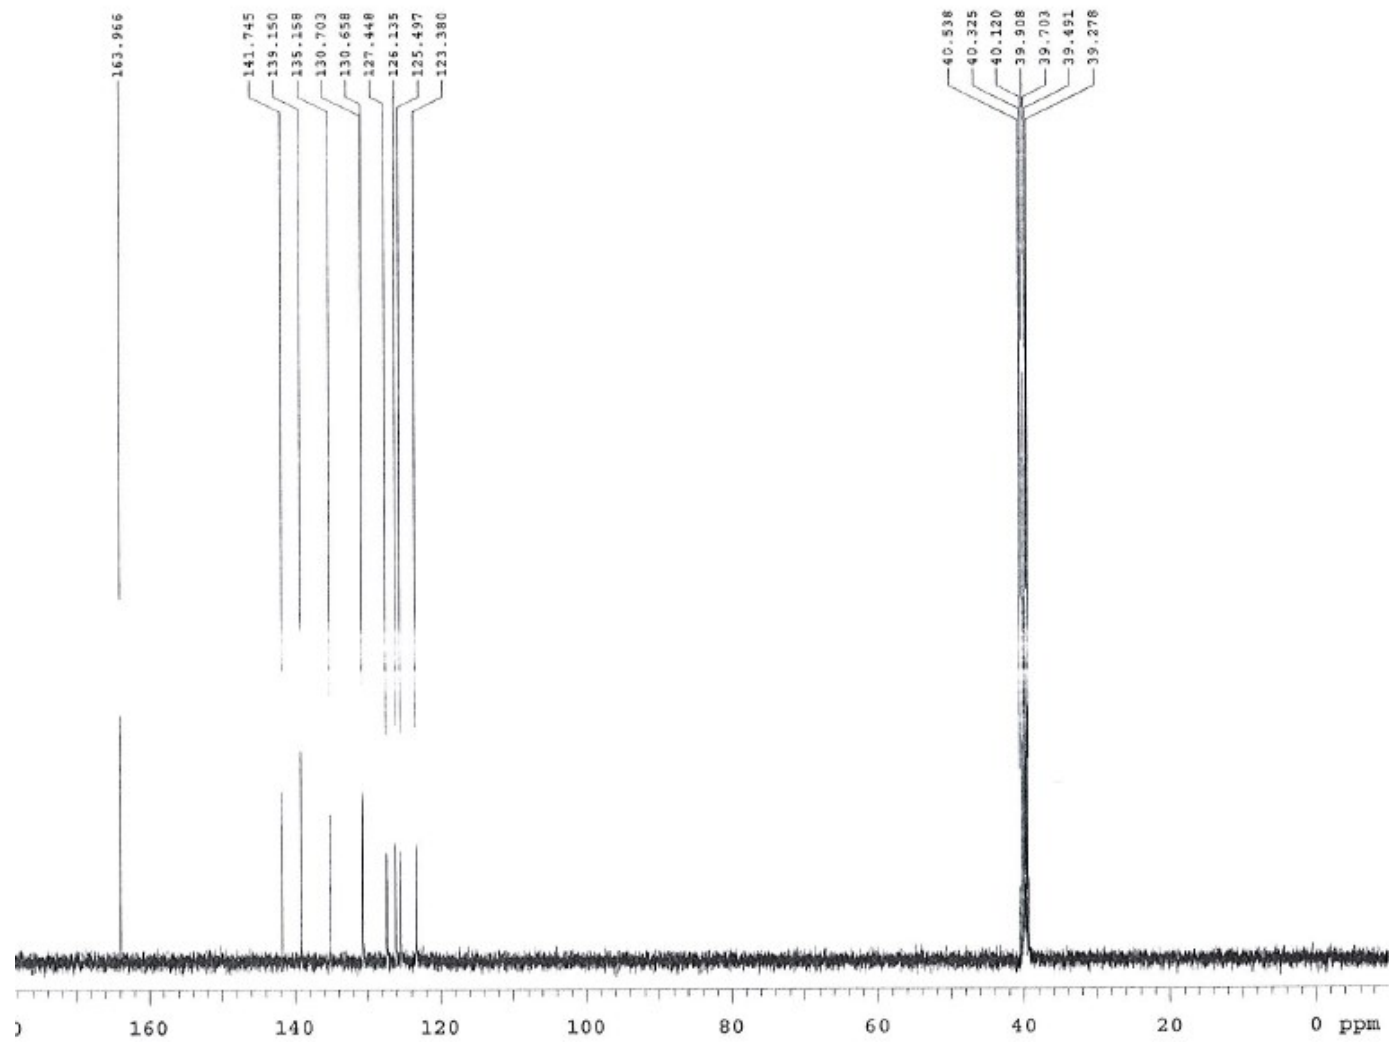

$^{13}\text{C}$  NMR spectrum of compound 3k in  $\text{DMSO-d}_6$

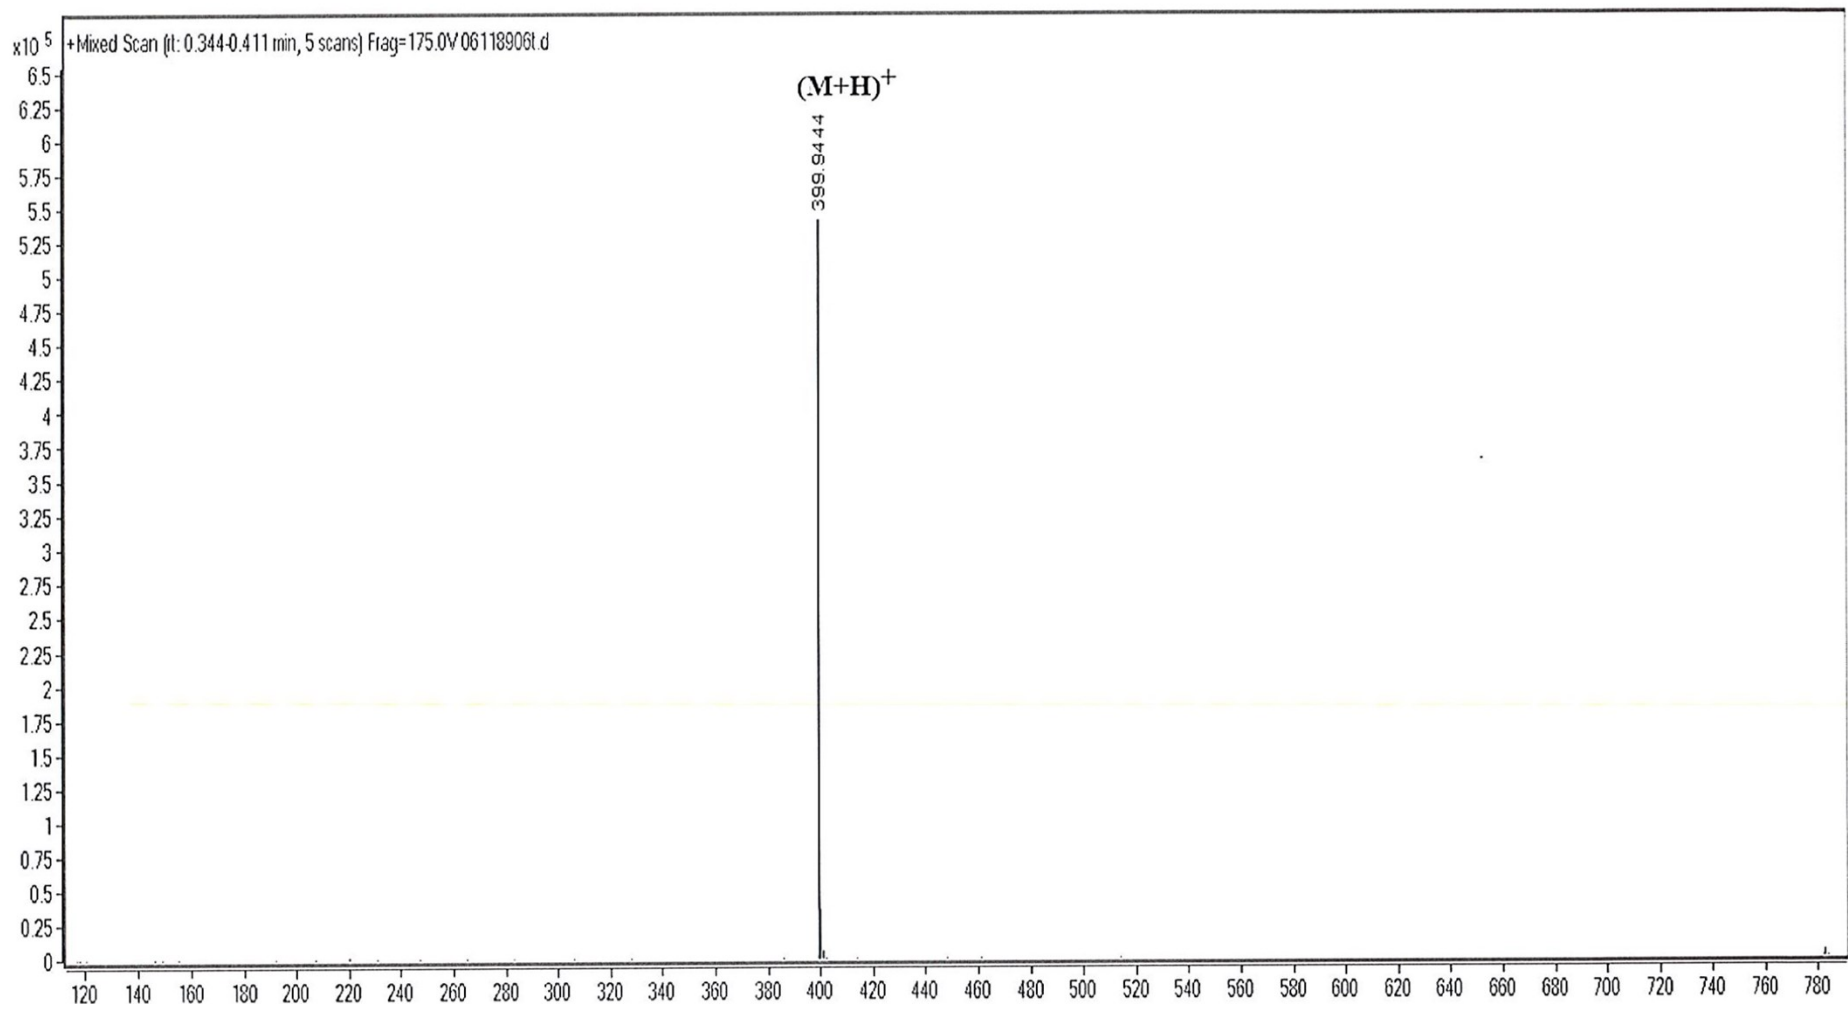

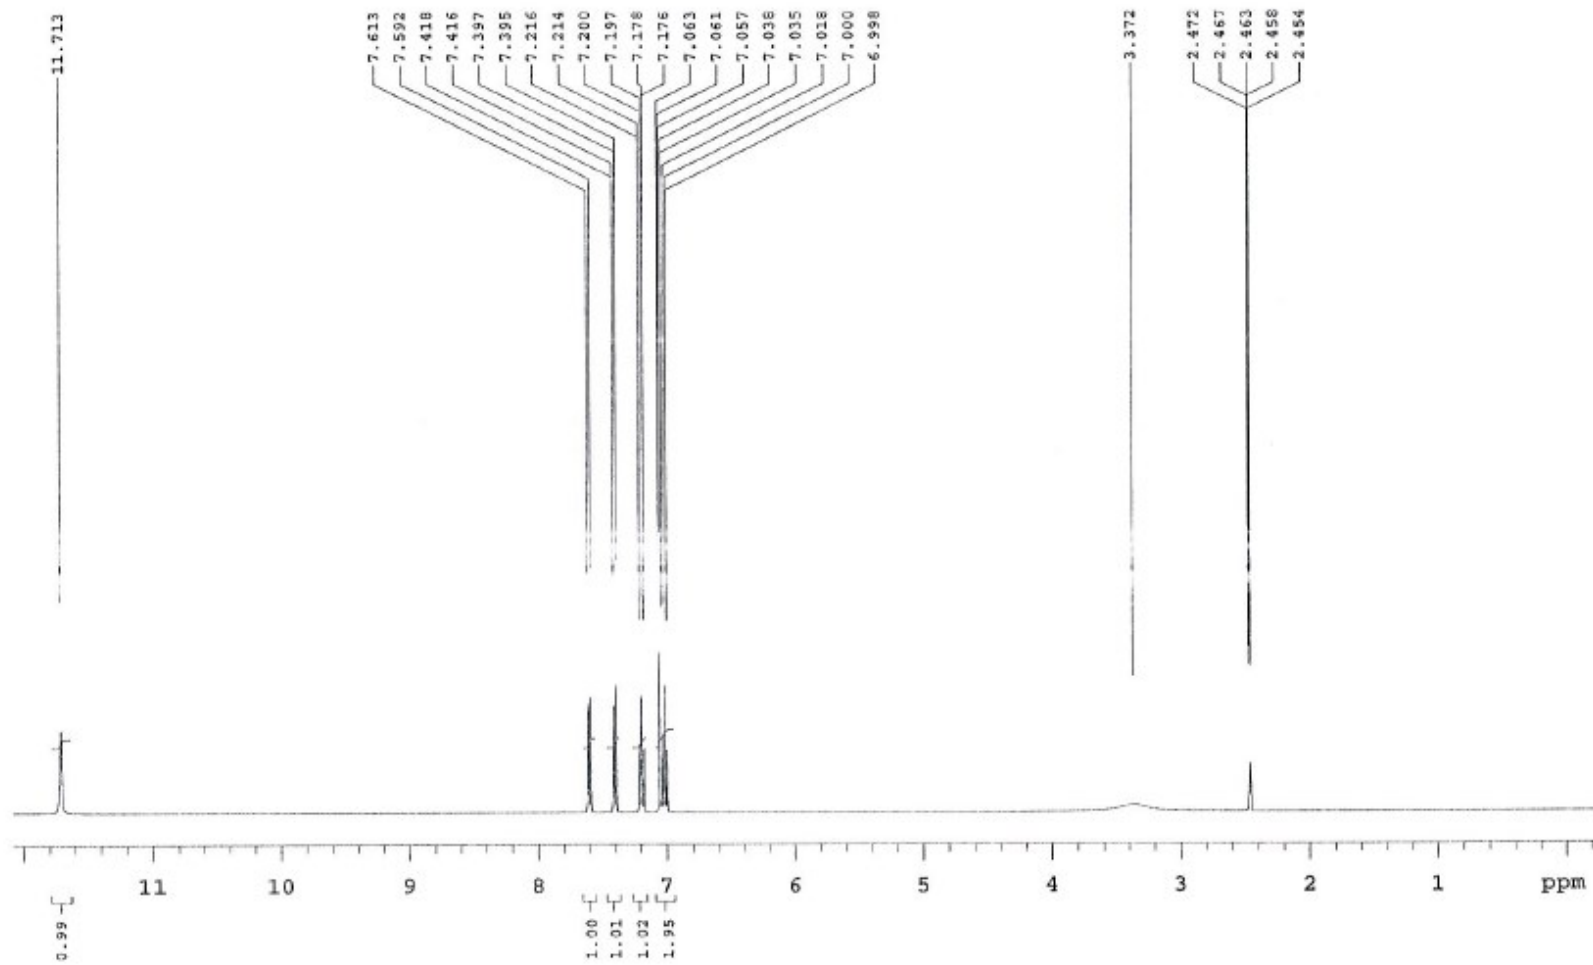

<sup>1</sup>H NMR spectrum of compound 3l in DMSO-d<sub>6</sub>

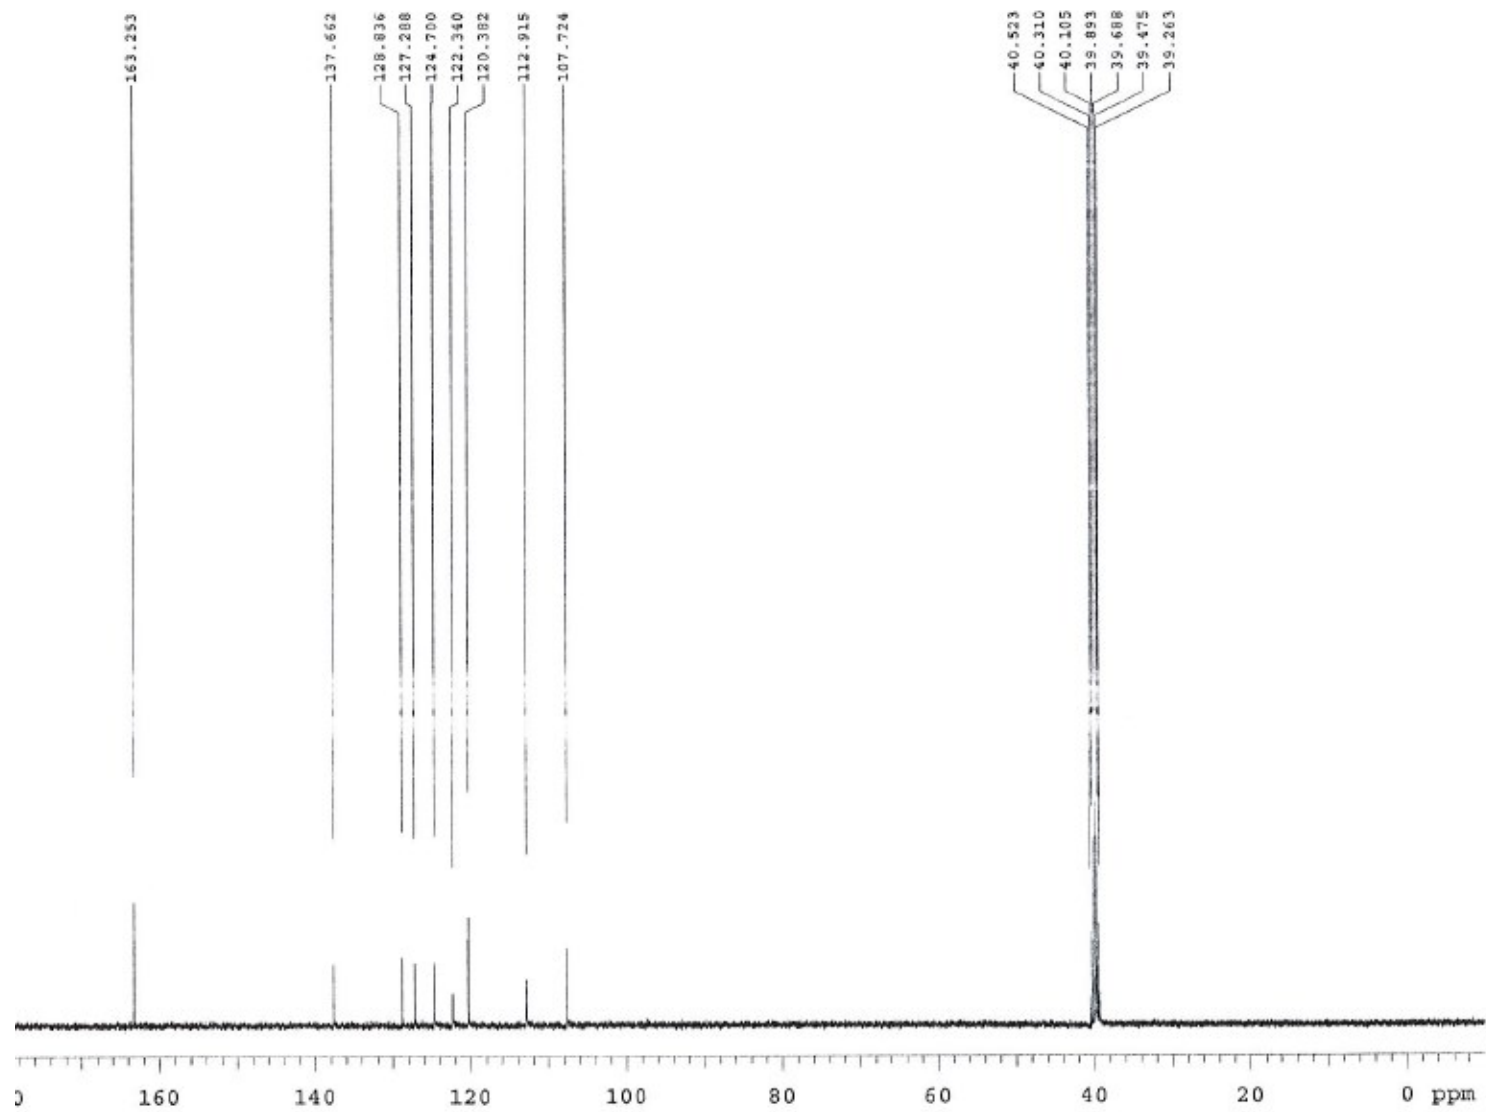

$^{13}\text{C}$  NMR spectrum of compound 3I in  $\text{DMSO-d}_6$

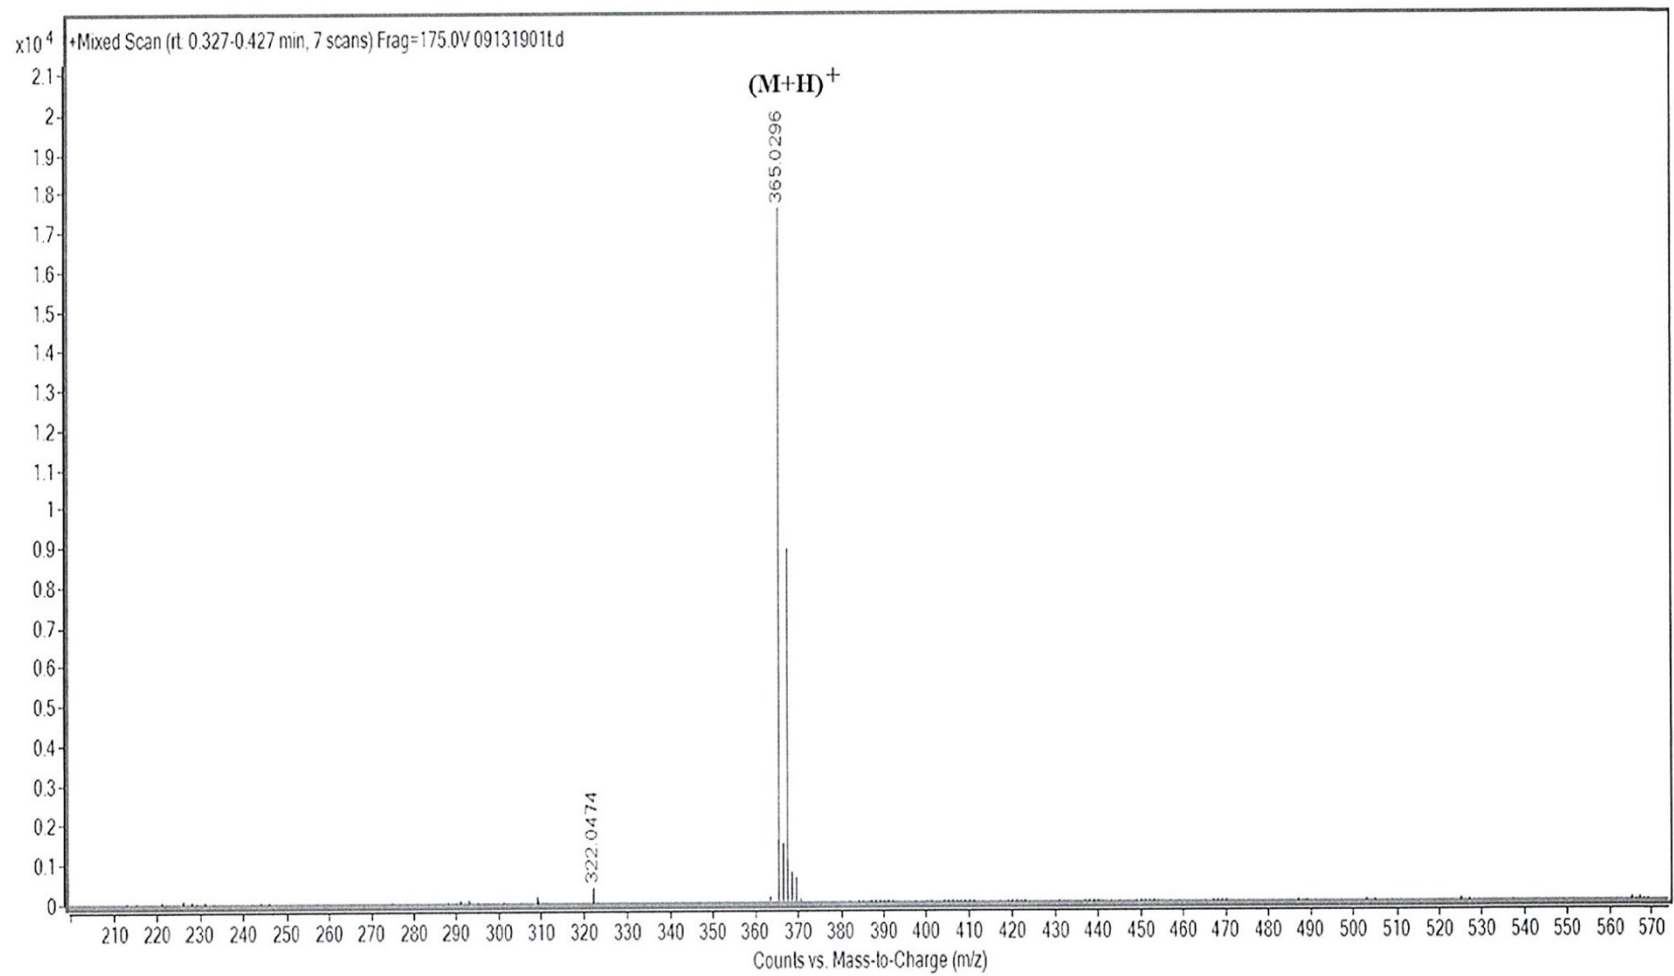

**HRMS spectrum of compound 3I**

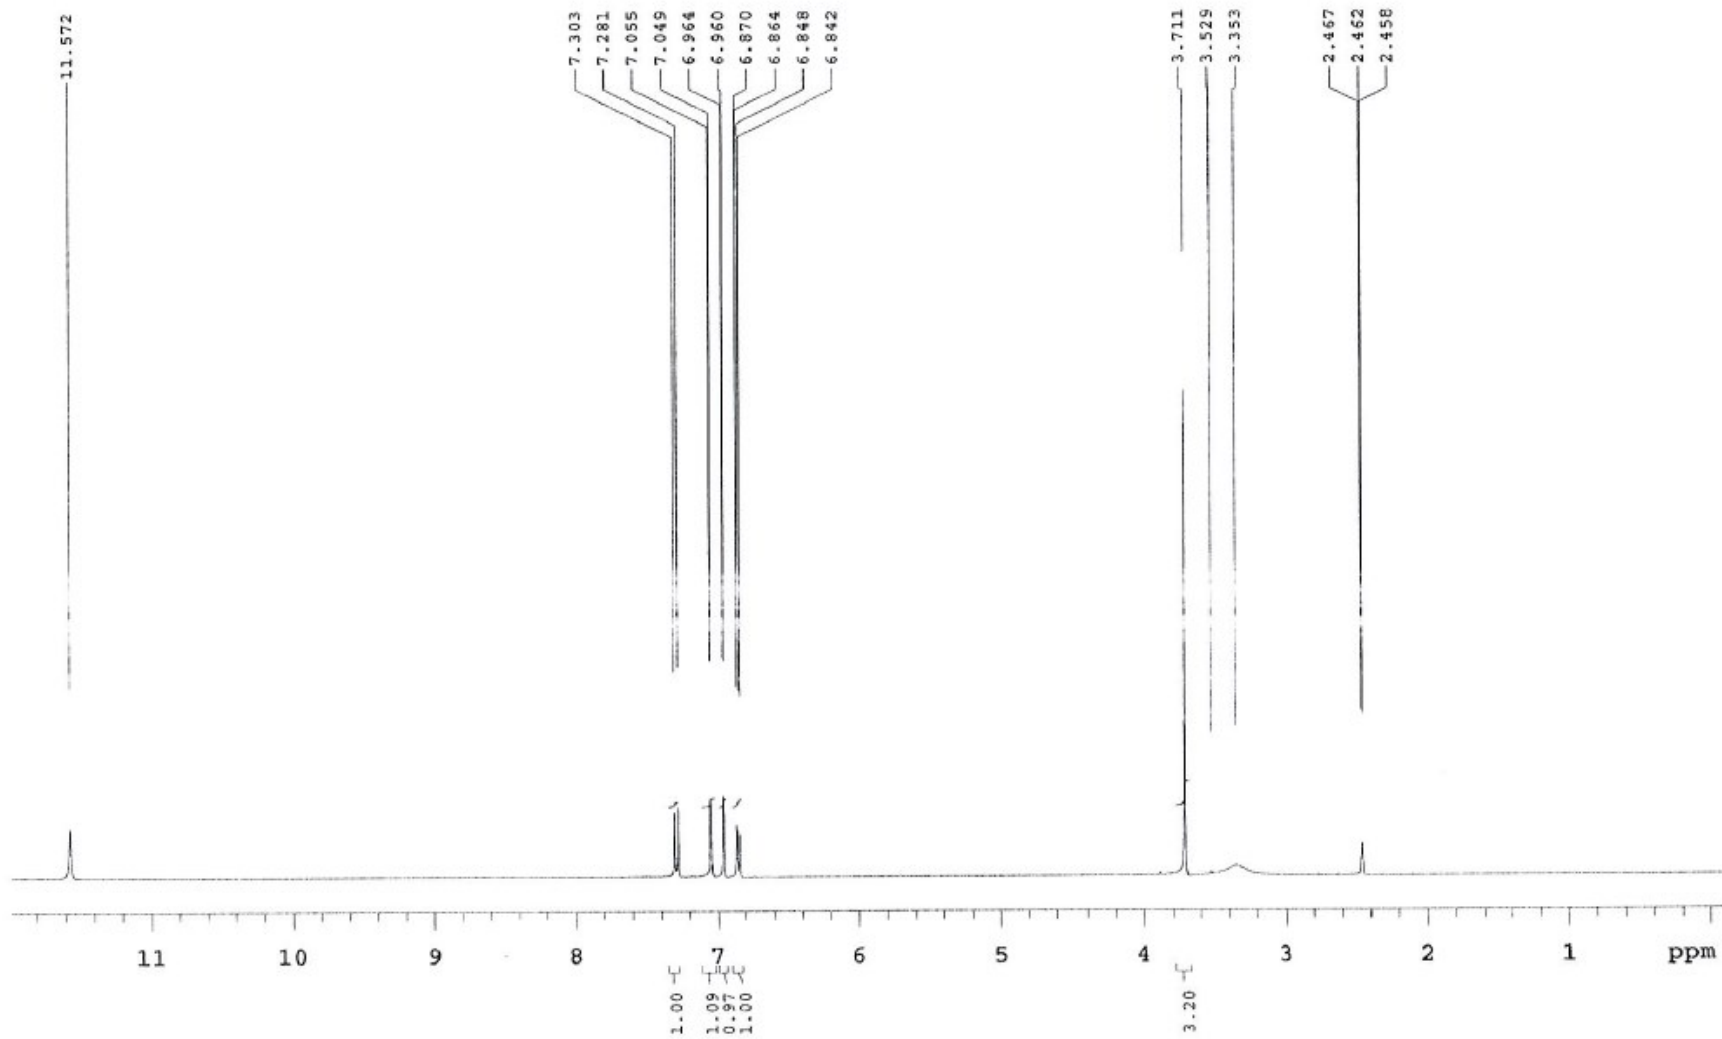

**$^1\text{H}$  NMR spectrum of compound 3m in  $\text{DMSO-d}_6$**

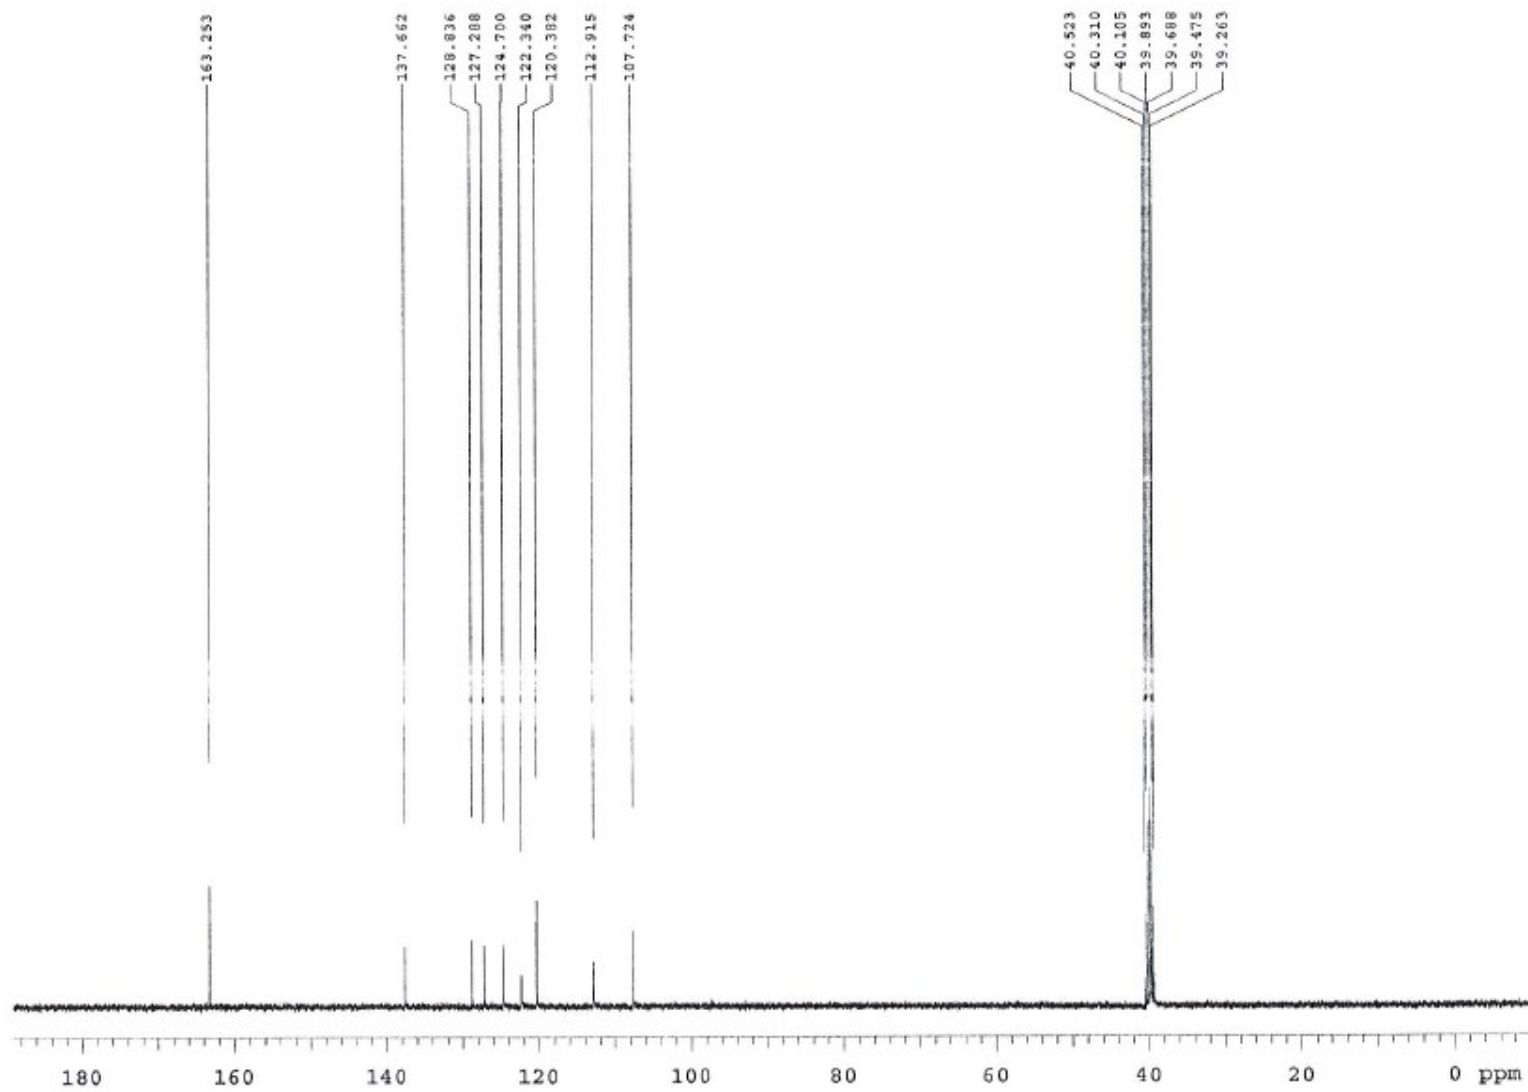

$^{13}\text{C}$  NMR spectrum of compound 3m in  $\text{DMSO-d}_6$

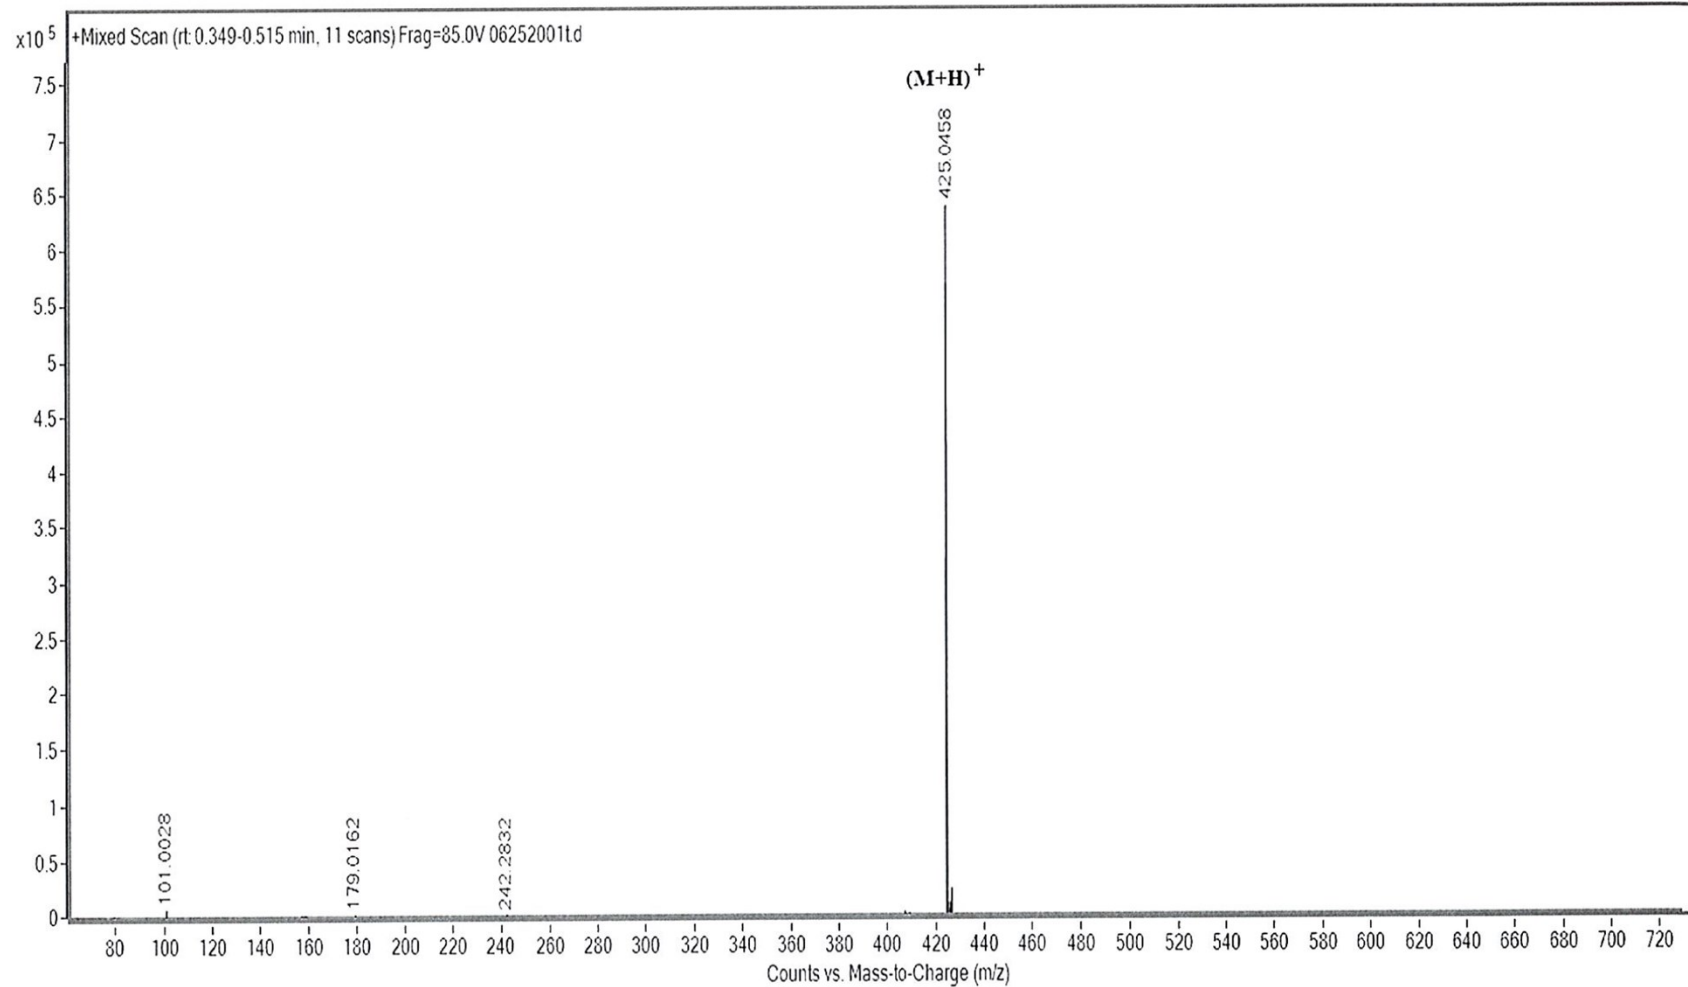

**HRMS spectrum of compound 3m**



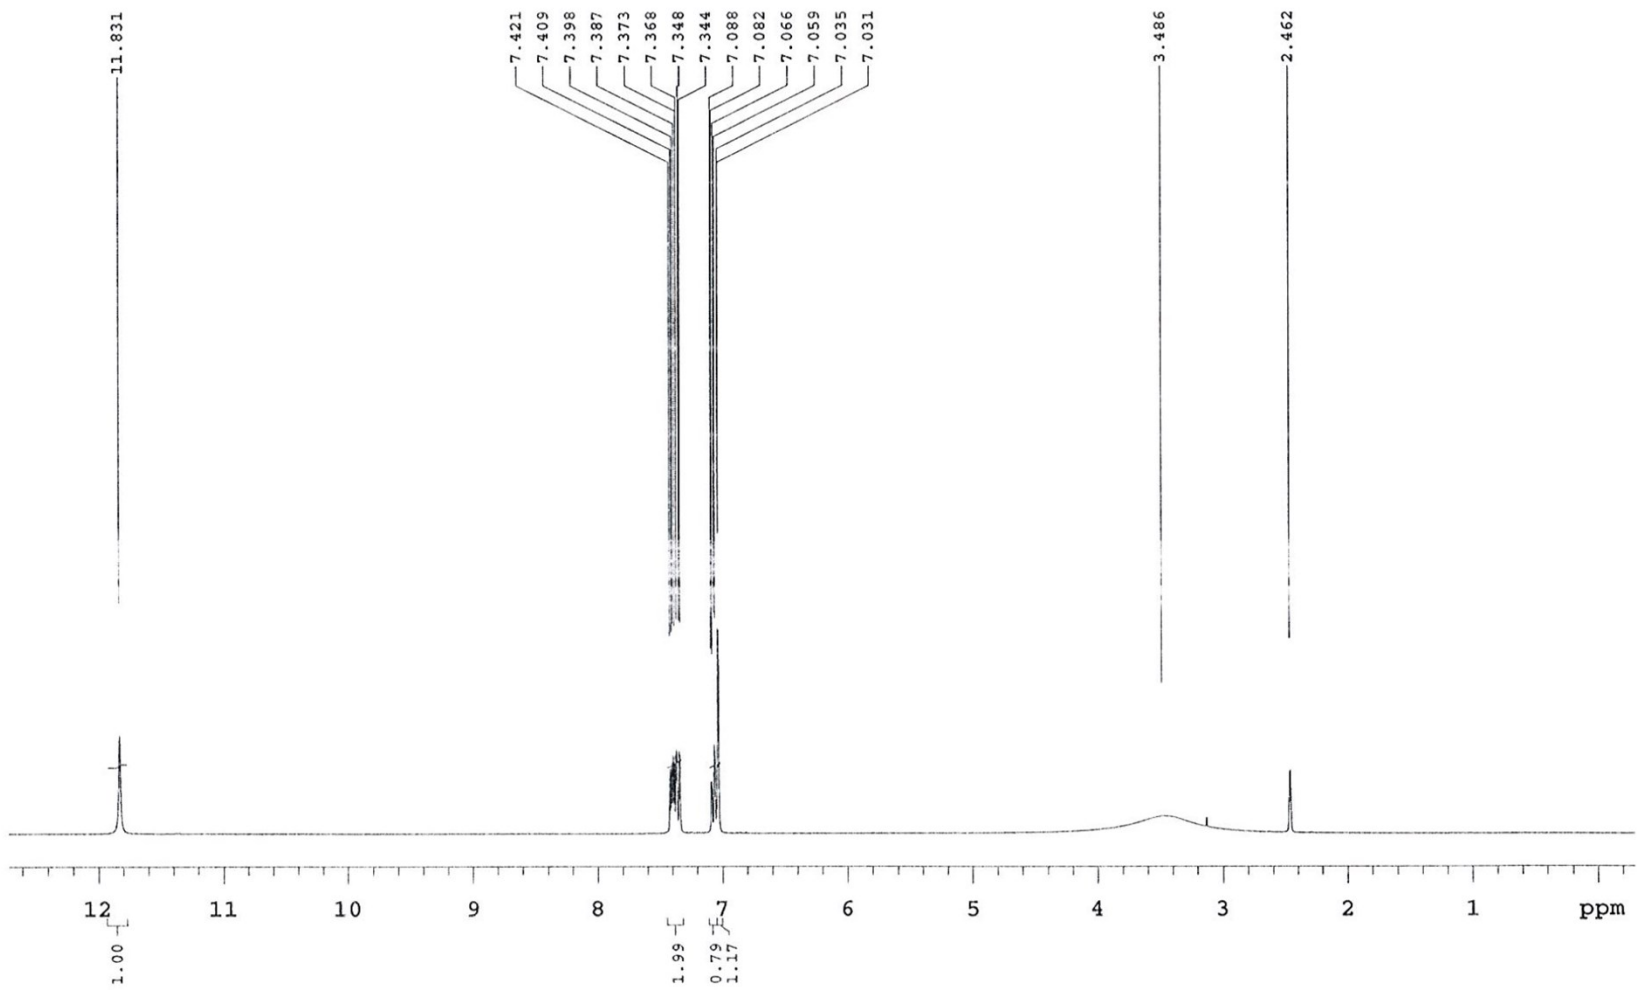

$^1\text{H}$  NMR spectrum of compound 3n in  $\text{DMSO-d}_6$

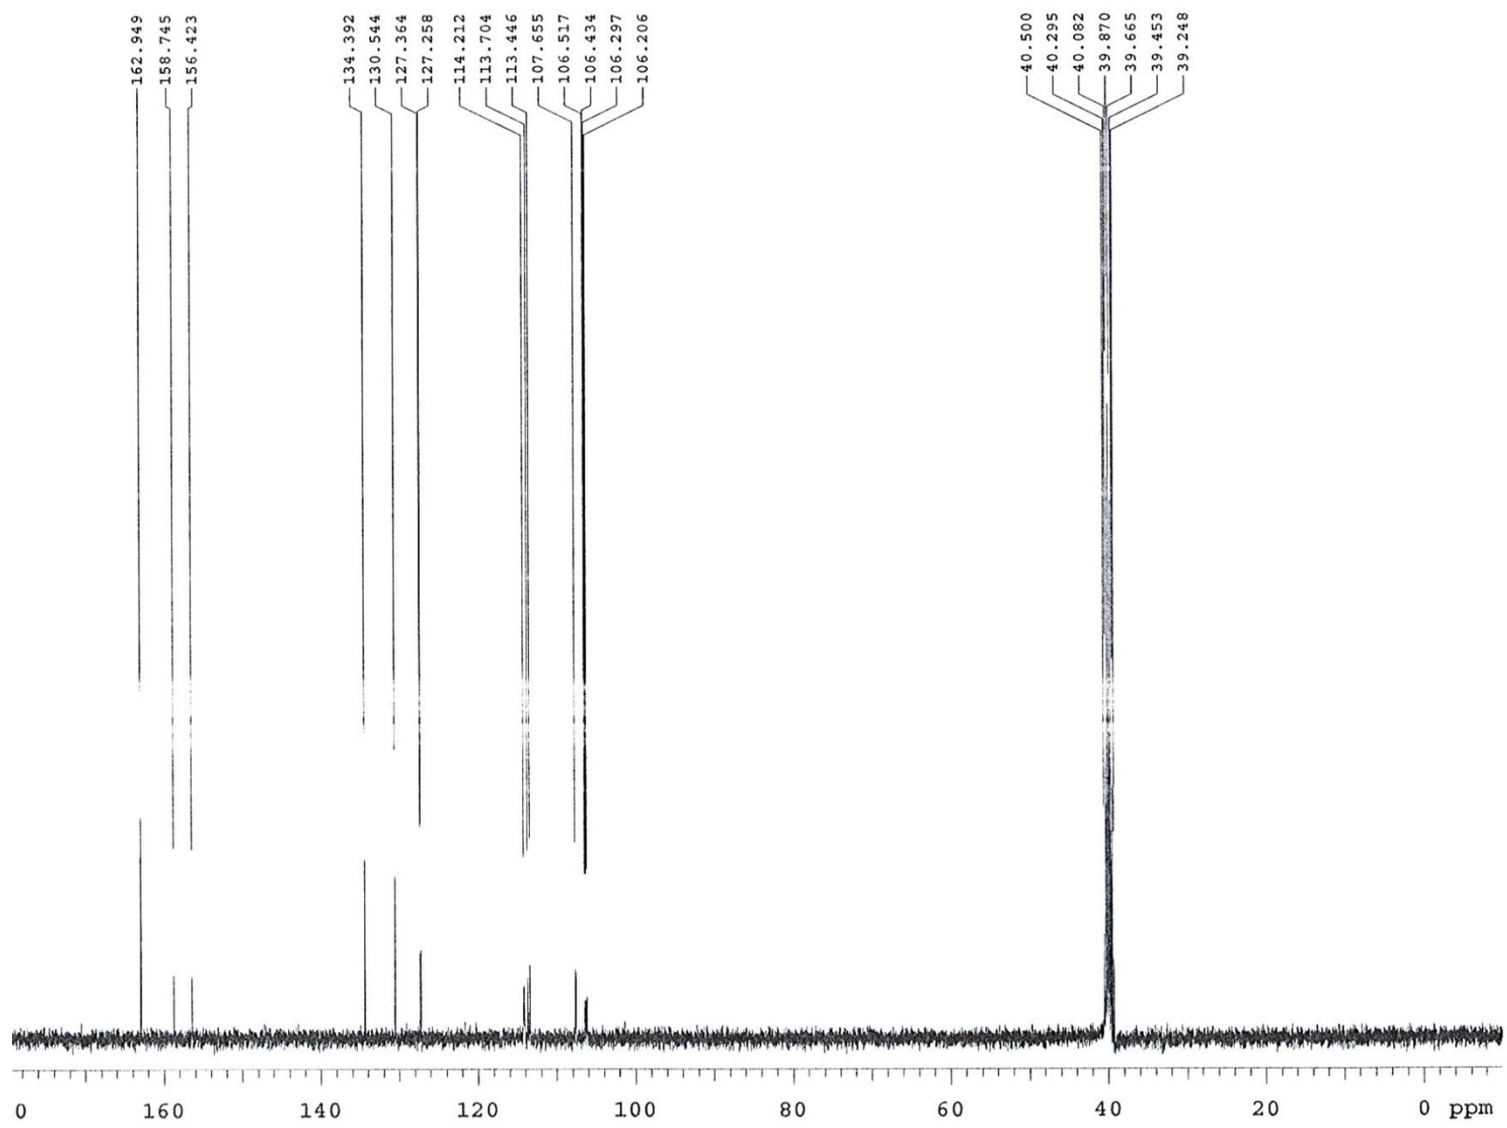

$^{13}\text{C}$  NMR spectrum of compound 3n in  $\text{DMSO-d}_6$

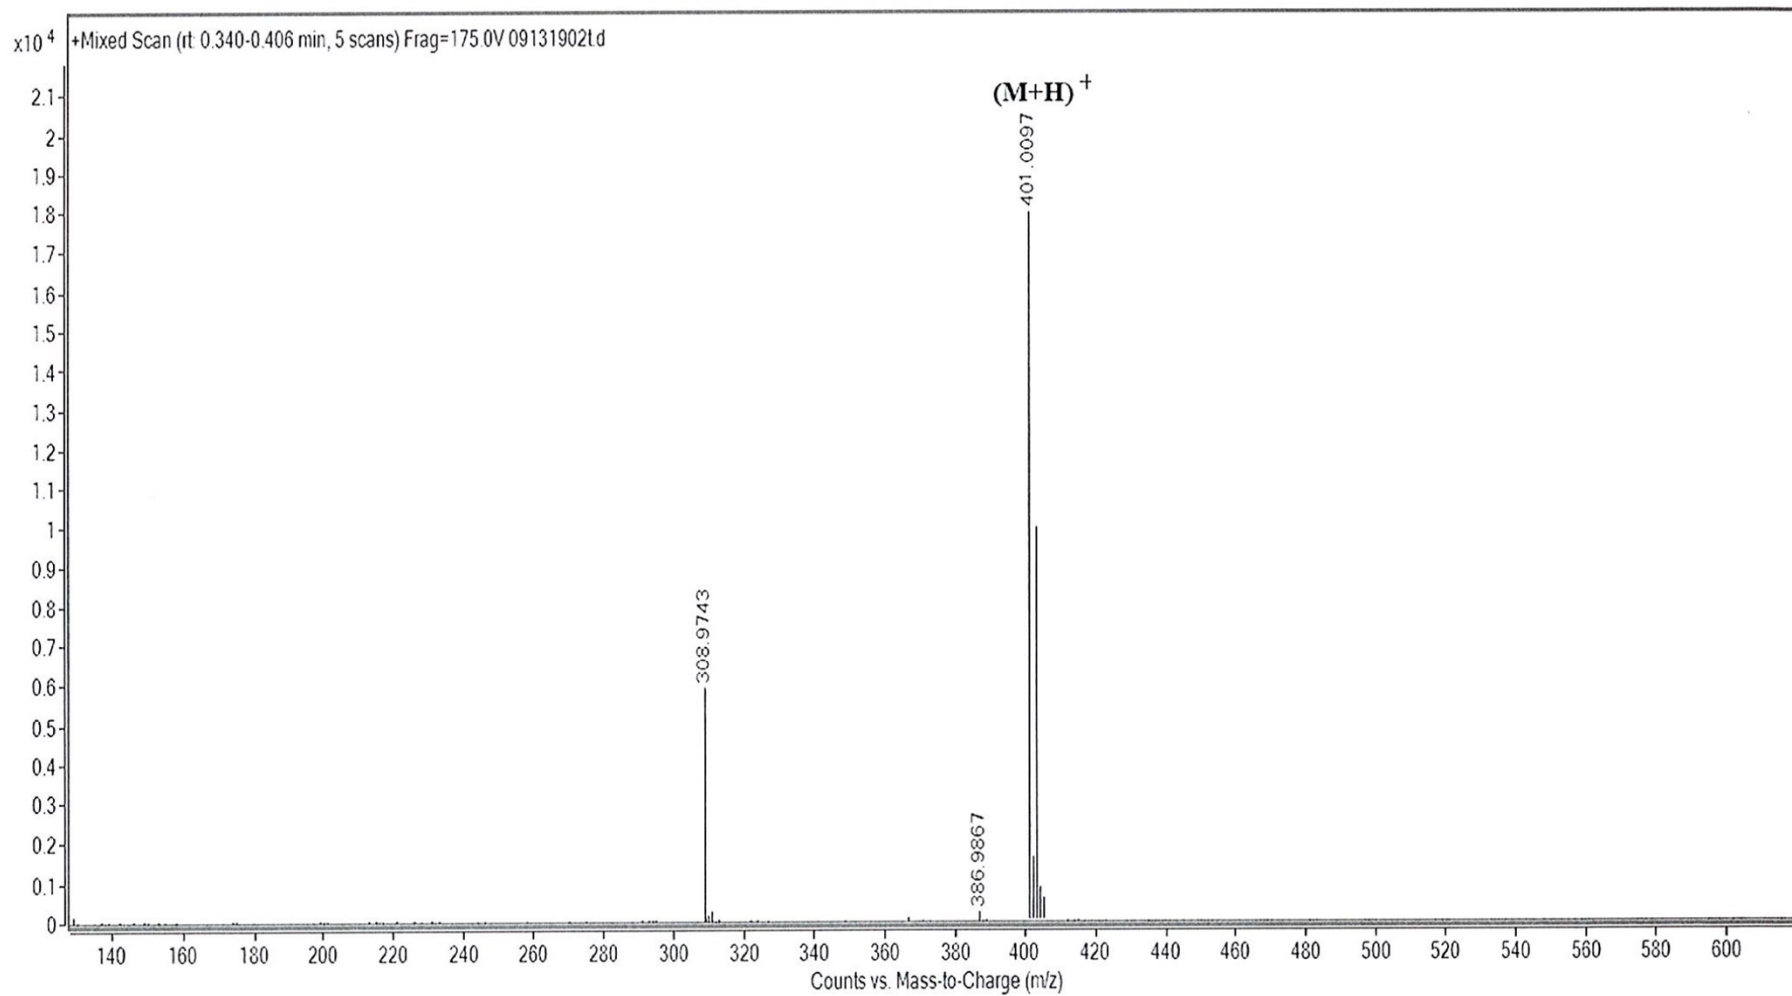

**HRMS spectrum of compound 3n**
